# Supplementary material for: Development and Validation of a Scale Assessing College Students’ Negative Attitudes Toward Generative AI-Assisted Academic Writing
Source: Research Square preprint supplement (doi:10.21203/rs.3.rs-6974623/v1), 2025-09-30
Supplement: Supplementary file 1 [file 024fabf30cea3d3d7738a4ed.docx]

Appendix A:

Scale Assessing College Students’ Negative Attitudes Toward Generative AI-Assisted Academic Writing

**Factor 1: Language homogenization**

1. I tend to use AI-recommended structures such as passive voice and complex sentences more frequently, resulting in a lack of variety in sentence patterns.
2. When writing on different topics, I often adopt high-frequency, standardized vocabulary suggested by AI, which makes my language style consistently uniform.
3. I follow AI-suggested writing structures, leading to formulaic overall organization and repetitive paragraph patterns.
4. I deliberately avoid subjective expression, causing the emotional dimension of my writing to become flat, lacking emotional fluctuation and warmth.

**Factor 2: Thought outsourcing**

1. I rely on AI-generated arguments and frameworks, reducing my own deep thinking.
2. I tend to directly use content provided by AI rather than refining or optimizing it myself.
3. I let AI review and evaluate my content instead of checking the reasoning and logic on my own.
4. I habitually adopt AI-generated ideas, which gradually diminishes my own creativity.
5. I unconsciously accept AI’s suggestions, weakening my sense of control over the content.
6. I gradually organize my writing according to AI’s logic, leading to a convergence in my own thinking style.

**Factor 3: Identity ambiguity**

1. I feel like an academic tailor, mechanically stitching together AI-generated segments, making it hard to identify my own contribution to the work.
2. I see myself as a "ghostwriter" in academia—bearing the author’s name while a large portion of the content is produced by AI—leading to an identity dilemma between authorship and actual input.
3. I spend more time revising AI-generated content than writing on my own. I’m unsure whether I’m a scholar or just an advanced AI proofreader.
4. With the powerful generative capacity of AI, I’ve gradually transformed from a researcher into an "academic paper producer," focusing more on efficient production than on exploring meaningful questions.
5. Writing papers now feels like participating in an academic Turing test—preserving AI-generated content while editing it enough to make it look "human-written" to deceive reviewers and plagiarism detectors.
6. Faced with the ethical challenges brought by AI, I may become a “bystander to ethics,” failing to actively participate in or guide the ethical standards of research.
