# Supplementary material for: Development and Validation of a Scale Assessing College Students’ Negative Attitudes Toward Generative AI-Assisted Academic Writing
Source: Research Square preprint supplement (doi:10.21203/rs.3.rs-6974623/v1), 2025-09-30
Supplement: Supplementary file 2 [file 1f5dd423ce05c6c15dbb8b2e.xlsx]

## Sheet: Sheet1
Sex	Education	BP	LH1	LH2	LH3	LH4	TO1	TO2	TO3	TO4	TO5	TO6	IA1	IA2	IA3	IA4	IA5	IA6	LH	TO	IA	Attitude
Female	Undergraduate	Urban	4	4	4	4	4	4	4	4	4	4	4	4	4	4	4	4	4	4	4	64
Female	Undergraduate	Rural	3	4	3	3	2	2	3	4	3	3	2	3	2	2	3	3	3.25	2.83333	2.5	45
Female	Undergraduate	Rural	4	2	2	2	1	1	1	1	2	2	5	4	5	5	5	5	2.5	1.33333	4.83333	47
Female	Undergraduate	Rural	4	2	3	3	4	4	4	4	4	4	4	4	4	4	4	4	3	4	4	60
Female	Undergraduate	Rural	4	4	4	4	4	4	4	4	4	4	4	4	4	4	4	4	4	4	4	64
Female	Undergraduate	Urban	4	4	4	4	4	4	4	4	4	4	4	4	4	4	4	4	4	4	4	64
Female	Undergraduate	Rural	3	3	3	3	3	3	3	3	3	3	3	3	3	3	3	3	3	3	3	48
Female	Undergraduate	Rural	3	3	3	3	3	3	3	3	3	3	3	3	3	3	3	3	3	3	3	48
Male	Undergraduate	Rural	3	3	3	3	3	3	3	3	3	3	3	3	3	3	3	3	3	3	3	48
Male	Undergraduate	Urban	3	3	3	3	3	4	3	3	3	3	3	3	3	3	3	3	3	3.16667	3	49
Female	Graduate	Rural	3	3	3	3	3	2	2	2	2	2	2	2	2	2	2	2	3	2.16667	2	37
Female	Undergraduate	Rural	5	5	5	5	5	5	5	5	5	5	5	5	5	5	5	5	5	5	5	80
Female	Undergraduate	Rural	3	3	3	3	3	3	3	3	3	3	3	3	3	3	3	3	3	3	3	48
Female	Undergraduate	Urban	4	4	4	3	2	2	2	2	3	2	3	3	3	3	3	3	3.75	2.16667	3	46
Female	Undergraduate	Rural	3	4	4	4	3	3	3	3	3	3	3	3	3	3	3	3	3.75	3	3	51
Female	Undergraduate	Rural	5	5	5	5	1	1	1	1	1	1	1	1	1	1	1	1	5	1	1	32
Female	Undergraduate	Rural	4	4	3	3	3	3	3	3	3	3	3	3	3	3	3	3	3.5	3	3	50
Male	Undergraduate	Rural	2	5	2	2	1	1	1	2	1	1	2	2	2	2	2	2	2.75	1.16667	2	30
Female	Undergraduate	Rural	2	2	2	2	2	2	2	2	2	2	2	2	2	2	2	2	2	2	2	32
Female	Undergraduate	Rural	4	4	4	4	4	4	4	4	4	4	4	4	4	4	4	4	4	4	4	64
Female	Undergraduate	Rural	3	3	3	3	3	3	3	3	3	3	2	2	2	2	2	2	3	3	2	42
Female	Undergraduate	Rural	3	3	3	3	3	3	3	3	3	3	3	3	3	3	3	3	3	3	3	48
Female	Undergraduate	Urban	3	3	3	3	3	3	3	3	3	3	3	3	3	3	3	3	3	3	3	48
Male	Undergraduate	Urban	3	3	4	4	3	3	4	3	2	3	3	4	3	3	3	4	3.5	3	3.33333	52
Female	Undergraduate	Rural	4	4	4	4	3	3	3	4	4	4	3	4	4	4	4	4	4	3.5	3.83333	60
Female	Undergraduate	Rural	3	4	3	3	1	1	1	1	1	2	2	2	3	2	2	2	3.25	1.16667	2.16667	33
Female	Undergraduate	Rural	5	5	5	4	4	4	4	4	4	4	4	4	4	5	5	5	4.75	4	4.5	70
Female	Graduate	Urban	4	4	4	4	4	4	4	4	4	4	4	4	4	4	4	4	4	4	4	64
Female	Undergraduate	Urban	3	3	3	3	3	3	3	3	3	3	3	3	3	3	3	3	3	3	3	48
Female	Graduate	Urban	5	5	5	5	2	2	2	2	2	2	3	3	3	3	3	3	5	2	3	50
Female	Undergraduate	Rural	2	2	2	2	2	2	2	2	2	2	2	2	2	2	2	2	2	2	2	32
Female	Undergraduate	Urban	2	3	2	4	4	4	5	4	4	2	4	2	2	2	2	2	2.75	3.83333	2.33333	48
Female	Graduate	Urban	4	4	4	4	4	2	2	2	3	2	2	2	2	2	2	2	4	2.5	2	43
Female	Undergraduate	Rural	5	5	5	5	5	5	5	5	5	5	5	5	5	5	5	5	5	5	5	80
Female	Undergraduate	Rural	4	4	3	4	3	3	3	3	3	3	3	3	3	3	3	3	3.75	3	3	51
Female	Graduate	Urban	3	3	3	3	3	3	3	3	3	3	3	3	3	3	3	3	3	3	3	48
Female	Undergraduate	Rural	3	3	3	3	3	3	3	3	3	3	3	3	3	3	3	3	3	3	3	48
Female	Graduate	Urban	4	3	3	3	2	2	2	2	2	2	2	2	2	2	2	3	3.25	2	2.16667	38
Female	Undergraduate	Urban	5	5	5	5	5	5	5	5	5	5	5	5	5	5	5	5	5	5	5	80
Female	Graduate	Urban	4	4	4	4	4	4	4	4	4	4	4	4	4	4	4	4	4	4	4	64
Female	Undergraduate	Rural	4	4	4	4	4	4	4	4	4	4	4	4	4	4	4	4	4	4	4	64
Female	Undergraduate	Rural	4	4	4	4	4	4	4	4	4	4	4	4	4	4	4	4	4	4	4	64
Female	Undergraduate	Rural	3	3	3	3	5	5	5	5	4	3	4	4	4	4	4	4	3	4.5	4	63
Female	Undergraduate	Rural	5	5	5	5	4	4	4	4	4	4	4	4	4	4	4	4	5	4	4	68
Female	Graduate	Urban	5	5	5	5	5	5	5	5	5	5	5	5	5	5	5	5	5	5	5	80
Female	Undergraduate	Rural	3	3	3	3	3	3	3	3	3	3	3	3	3	3	3	3	3	3	3	48
Female	Undergraduate	Rural	3	4	2	3	4	2	4	2	3	3	4	4	2	3	3	2	3	3	3	48
Female	Undergraduate	Rural	5	5	5	5	5	5	5	5	5	5	1	5	5	5	5	5	5	5	4.33333	76
Female	Undergraduate	Rural	2	2	2	2	2	2	2	2	2	2	2	2	2	2	2	2	2	2	2	32
Female	Undergraduate	Urban	4	4	4	4	4	4	4	4	4	4	4	4	4	4	4	4	4	4	4	64
Female	Undergraduate	Urban	3	3	3	3	3	3	3	3	3	3	3	3	3	3	3	3	3	3	3	48
Female	Undergraduate	Rural	3	4	4	4	3	3	3	4	3	3	3	3	4	3	4	3	3.75	3.16667	3.33333	54
Female	Undergraduate	Rural	4	4	4	4	4	4	4	3	4	4	3	3	3	3	3	3	4	3.83333	3	57
Male	Undergraduate	Rural	4	4	4	4	3	5	4	4	4	4	4	4	4	4	4	4	4	4	4	64
Male	Undergraduate	Rural	4	2	4	5	4	2	4	4	3	5	4	2	4	2	4	3	3.75	3.66667	3.16667	56
Female	Undergraduate	Urban	2	3	4	2	2	4	4	4	4	4	4	4	4	4	4	4	2.75	3.66667	4	57
Female	Undergraduate	Rural	4	4	4	4	4	4	4	4	4	4	4	4	4	4	4	4	4	4	4	64
Female	Undergraduate	Rural	3	3	3	3	3	3	3	3	3	3	3	3	3	3	3	3	3	3	3	48
Male	Undergraduate	Rural	3	3	3	3	3	3	3	3	3	3	4	4	4	4	4	4	3	3	4	54
Female	Undergraduate	Rural	4	4	4	4	4	4	4	4	4	4	4	4	4	4	4	4	4	4	4	64
Male	Undergraduate	Urban	4	4	4	4	4	4	4	4	4	4	4	4	4	4	4	4	4	4	4	64
Female	Undergraduate	Rural	3	3	3	3	3	3	3	3	3	3	3	3	3	3	3	3	3	3	3	48
Female	Undergraduate	Rural	4	3	3	3	2	3	2	3	3	3	2	3	3	3	3	3	3.25	2.66667	2.83333	46
Female	Undergraduate	Urban	4	4	4	4	3	2	2	2	2	2	2	2	2	2	2	2	4	2.16667	2	41
Female	Undergraduate	Rural	3	3	3	3	3	3	3	3	3	3	3	3	3	3	3	3	3	3	3	48
Female	Graduate	Urban	3	3	4	4	3	2	3	2	2	2	1	1	1	1	1	1	3.5	2.33333	1	34
Female	Undergraduate	Rural	3	3	3	4	3	3	3	3	3	3	4	4	4	4	4	4	3.25	3	4	55
Female	Undergraduate	Rural	3	3	3	4	3	3	2	3	3	3	3	3	3	3	3	3	3.25	2.83333	3	48
Female	Undergraduate	Rural	5	5	5	5	3	3	4	4	3	4	4	4	5	3	4	5	5	3.5	4.16667	66
Female	Undergraduate	Rural	5	5	5	5	5	5	5	5	5	5	5	5	5	5	5	5	5	5	5	80
Male	Undergraduate	Rural	4	4	4	4	4	4	4	4	4	4	4	4	4	4	4	4	4	4	4	64
Female	Undergraduate	Rural	3	3	3	3	3	3	3	3	3	3	3	3	3	3	3	3	3	3	3	48
Female	Undergraduate	Rural	3	3	3	2	3	2	4	3	4	2	3	2	2	3	4	3	2.75	3	2.83333	46
Female	Undergraduate	Urban	3	3	3	3	3	3	3	3	3	3	3	3	3	3	3	3	3	3	3	48
Female	Undergraduate	Rural	3	3	3	3	3	3	3	3	3	3	3	3	3	3	3	3	3	3	3	48
Female	Undergraduate	Rural	3	3	3	3	3	3	3	3	3	3	3	3	3	3	3	3	3	3	3	48
Female	Undergraduate	Rural	3	3	4	3	3	3	3	4	4	4	4	4	4	4	4	4	3.25	3.5	4	58
Female	Undergraduate	Rural	2	2	2	2	2	2	2	2	2	2	2	2	2	2	2	2	2	2	2	32
Female	Undergraduate	Urban	3	3	3	2	4	4	3	4	4	4	4	4	4	4	4	4	2.75	3.83333	4	58
Female	Undergraduate	Urban	4	3	3	4	4	4	4	4	4	4	4	4	4	4	4	4	3.5	4	4	62
Female	Undergraduate	Rural	4	4	4	4	4	4	4	4	4	4	4	4	4	4	4	4	4	4	4	64
Female	Undergraduate	Urban	2	2	2	2	2	2	2	2	2	2	2	2	2	2	2	2	2	2	2	32
Male	Graduate	Urban	5	5	5	5	5	5	5	5	5	5	5	5	5	5	5	5	5	5	5	80
Female	Undergraduate	Rural	1	1	1	1	1	1	1	1	1	1	3	1	2	1	1	1	1	1	1.5	19
Male	Undergraduate	Rural	3	4	4	4	3	3	3	3	3	3	2	2	2	2	2	2	3.75	3	2	45
Male	Undergraduate	Rural	5	5	5	5	5	5	5	5	5	5	5	5	5	5	5	5	5	5	5	80
Female	Undergraduate	Rural	3	3	3	3	3	3	3	3	3	3	3	3	3	3	3	3	3	3	3	48
Male	Undergraduate	Rural	3	3	3	3	3	3	3	3	3	3	3	3	3	3	3	3	3	3	3	48
Female	Graduate	Urban	2	4	2	3	2	2	2	4	3	3	3	3	2	3	4	2	2.75	2.66667	2.83333	44
Female	Undergraduate	Urban	4	4	4	4	4	4	4	4	4	4	4	4	4	4	4	4	4	4	4	64
Female	Undergraduate	Rural	4	4	4	4	3	3	4	4	4	3	4	4	3	3	4	3	4	3.5	3.5	58
Female	Undergraduate	Urban	4	4	4	4	4	4	4	4	4	4	4	4	4	4	4	4	4	4	4	64
Female	Undergraduate	Urban	4	4	4	4	4	4	4	4	4	4	4	4	4	4	4	4	4	4	4	64
Female	Undergraduate	Rural	4	4	4	3	4	3	3	4	4	4	4	4	3	3	3	3	3.75	3.66667	3.33333	57
Female	Undergraduate	Urban	3	3	3	3	3	3	3	3	3	3	3	3	3	3	3	3	3	3	3	48
Male	Undergraduate	Rural	4	4	5	3	5	4	4	4	4	5	5	4	3	4	5	4	4	4.33333	4.16667	67
Female	Undergraduate	Rural	3	4	3	2	2	3	3	2	4	2	4	3	2	3	2	4	3	2.66667	3	46
Female	Undergraduate	Rural	3	3	3	3	3	3	3	4	4	3	3	3	3	3	3	3	3	3.33333	3	50
Male	Undergraduate	Urban	4	4	4	4	4	4	4	4	2	4	3	3	3	3	4	4	4	3.66667	3.33333	58
Female	Undergraduate	Rural	2	3	4	3	2	2	2	3	3	2	3	2	2	2	2	2	3	2.33333	2.16667	39
Female	Undergraduate	Rural	3	4	4	4	4	4	4	4	4	4	4	4	4	4	4	4	3.75	4	4	63
Female	Undergraduate	Rural	4	4	4	3	3	3	3	3	3	3	3	3	3	3	3	3	3.75	3	3	51
Female	Undergraduate	Urban	5	5	5	5	1	1	1	1	1	1	3	3	3	3	3	3	5	1	3	44
Female	Undergraduate	Rural	3	5	4	5	3	3	5	3	5	4	5	5	4	5	4	4	4.25	3.83333	4.5	67
Female	Undergraduate	Rural	4	4	4	4	4	4	4	4	4	4	4	4	4	4	4	4	4	4	4	64
Female	Undergraduate	Rural	5	5	5	5	4	4	4	5	4	4	4	4	4	4	4	4	5	4.16667	4	69
Female	Undergraduate	Urban	4	4	4	4	3	3	3	3	3	3	3	3	3	3	3	3	4	3	3	52
Female	Undergraduate	Rural	1	1	1	1	1	1	1	1	1	1	2	2	2	2	2	2	1	1	2	22
Female	Graduate	Urban	3	5	3	3	3	3	3	3	3	3	3	3	3	3	3	3	3.5	3	3	50
Female	Undergraduate	Rural	3	3	4	4	3	3	3	3	3	2	4	3	4	3	4	3	3.5	2.83333	3.5	52
Female	Undergraduate	Rural	4	4	4	4	4	4	4	4	4	4	4	4	4	4	4	4	4	4	4	64
Female	Undergraduate	Rural	4	4	4	4	4	4	4	4	4	4	4	4	4	4	4	4	4	4	4	64
Female	Undergraduate	Urban	4	4	3	3	3	4	4	3	4	3	4	3	4	3	3	3	3.5	3.5	3.33333	55
Female	Undergraduate	Rural	4	4	4	4	4	4	4	4	4	4	4	4	4	4	4	4	4	4	4	64
Female	Undergraduate	Urban	3	4	4	3	3	4	2	5	5	5	5	5	5	5	5	5	3.5	4	5	68
Female	Undergraduate	Urban	3	3	4	2	2	2	3	3	2	3	3	3	2	3	3	3	3	2.5	2.83333	44
Male	Undergraduate	Rural	4	4	4	4	4	4	4	4	4	4	4	4	4	4	4	4	4	4	4	64
Female	Undergraduate	Rural	3	3	3	3	4	4	4	4	3	3	2	2	3	3	3	3	3	3.66667	2.66667	50
Female	Undergraduate	Rural	5	5	5	5	5	5	5	5	5	5	5	5	5	5	5	5	5	5	5	80
Female	Undergraduate	Urban	3	3	3	3	3	3	3	3	3	3	2	2	2	2	2	2	3	3	2	42
Male	Undergraduate	Rural	3	3	3	3	3	3	3	3	3	3	3	3	3	3	3	3	3	3	3	48
Female	Undergraduate	Rural	4	4	5	4	4	4	4	3	3	3	3	2	2	4	2	4	4.25	3.5	2.83333	55
Female	Undergraduate	Rural	4	2	2	2	3	2	2	2	3	3	3	2	3	4	2	3	2.5	2.5	2.83333	42
Female	Undergraduate	Rural	4	4	5	4	4	3	4	4	3	4	4	4	4	3	4	4	4.25	3.66667	3.83333	62
Female	Undergraduate	Rural	4	4	4	4	4	4	4	4	4	4	4	4	4	4	4	4	4	4	4	64
Female	Undergraduate	Urban	4	4	4	4	4	4	4	4	4	4	4	4	3	3	3	3	4	4	3.33333	60
Female	Undergraduate	Rural	2	4	2	3	2	2	2	2	2	2	2	2	2	2	2	2	2.75	2	2	35
Female	Undergraduate	Rural	3	3	3	3	2	2	2	2	2	2	2	2	2	2	2	2	3	2	2	36
Female	Undergraduate	Rural	4	4	4	4	3	3	3	3	3	3	3	3	3	3	3	3	4	3	3	52
Male	Undergraduate	Rural	4	4	4	4	4	2	2	2	4	4	4	4	4	4	4	4	4	3	4	58
Female	Undergraduate	Rural	4	4	4	4	2	2	2	4	2	2	3	3	3	3	3	3	4	2.33333	3	48
Female	Undergraduate	Rural	4	3	4	4	3	4	3	4	3	3	4	4	3	4	3	5	3.75	3.33333	3.83333	58
Male	Undergraduate	Rural	3	4	4	4	3	4	4	4	4	4	4	4	4	4	3	4	3.75	3.83333	3.83333	61
Female	Undergraduate	Rural	4	4	4	4	3	2	2	2	2	2	3	3	3	3	3	3	4	2.16667	3	47
Female	Undergraduate	Urban	4	3	5	4	3	2	3	3	3	3	3	3	3	3	3	3	4	2.83333	3	51
Female	Undergraduate	Urban	4	4	4	3	3	4	4	4	4	4	4	4	4	4	4	4	3.75	3.83333	4	62
Female	Undergraduate	Rural	4	4	4	4	4	4	4	4	4	4	4	4	4	4	4	4	4	4	4	64
Female	Undergraduate	Rural	3	3	3	3	3	3	3	3	3	3	3	3	3	3	3	3	3	3	3	48
Female	Undergraduate	Rural	3	3	3	3	3	3	3	3	3	3	3	3	3	3	3	3	3	3	3	48
Female	Undergraduate	Rural	4	4	4	4	3	3	3	3	3	3	2	2	2	3	3	3	4	3	2.5	49
Female	Undergraduate	Urban	2	4	3	4	4	4	4	4	3	4	3	4	4	4	3	4	3.25	3.83333	3.66667	58
Female	Undergraduate	Urban	4	4	4	4	4	4	4	4	4	4	4	4	4	4	4	4	4	4	4	64
Female	Undergraduate	Urban	3	3	4	4	5	5	5	5	5	5	5	5	5	5	5	5	3.5	5	5	74
Male	Undergraduate	Rural	5	4	4	4	4	4	5	5	5	5	5	5	5	5	4	4	4.25	4.66667	4.66667	73
Male	Undergraduate	Rural	3	4	4	4	3	4	4	4	3	4	4	4	4	4	4	4	3.75	3.66667	4	61
Male	Undergraduate	Urban	5	5	5	5	5	5	5	5	5	5	5	5	5	5	4	4	5	5	4.66667	78
Male	Undergraduate	Rural	4	5	5	4	4	4	4	4	5	4	4	4	4	5	4	2	4.5	4.16667	3.83333	66
Female	Undergraduate	Rural	4	4	3	4	2	2	2	2	3	3	3	4	3	3	2	3	3.75	2.33333	3	47
Female	Undergraduate	Rural	4	3	4	4	4	4	4	4	4	4	4	4	4	4	3	4	3.75	4	3.83333	62
Male	Undergraduate	Rural	4	4	4	4	4	4	4	4	4	4	4	4	4	4	4	4	4	4	4	64
Male	Undergraduate	Rural	5	5	5	5	5	5	5	5	5	5	5	5	5	5	5	5	5	5	5	80
Female	Undergraduate	Rural	3	3	3	3	3	3	3	3	3	3	3	3	3	3	3	3	3	3	3	48
Female	Undergraduate	Rural	4	4	4	4	4	3	4	4	3	4	3	4	3	3	4	3	4	3.66667	3.33333	58
Male	Undergraduate	Urban	1	3	2	2	1	1	2	2	1	1	1	2	2	1	2	2	2	1.33333	1.66667	26
Male	Undergraduate	Rural	3	3	3	2	2	2	2	2	2	2	2	2	4	2	2	3	2.75	2	2.5	38
Male	Undergraduate	Rural	3	3	3	3	2	2	2	2	2	2	2	2	2	2	2	2	3	2	2	36
Male	Undergraduate	Rural	5	5	5	5	5	5	5	5	5	5	5	5	5	5	5	5	5	5	5	80
Male	Undergraduate	Rural	5	5	5	5	5	5	5	5	5	5	5	5	5	5	5	5	5	5	5	80
Female	Undergraduate	Rural	3	3	3	3	3	3	3	3	3	3	3	3	3	3	3	3	3	3	3	48
Female	Undergraduate	Urban	3	3	3	3	3	3	4	4	4	4	4	4	4	3	3	3	3	3.66667	3.5	55
Female	Undergraduate	Rural	4	5	4	5	5	4	5	5	4	3	5	4	4	5	5	4	4.5	4.33333	4.5	71
Male	Undergraduate	Rural	4	4	4	4	4	4	3	3	4	4	4	3	3	3	3	3	4	3.66667	3.16667	57
Male	Undergraduate	Urban	3	3	3	3	3	3	3	3	3	3	3	3	3	3	3	3	3	3	3	48
Female	Undergraduate	Rural	3	3	3	3	3	3	4	4	3	4	4	3	4	3	4	3	3	3.5	3.5	54
Female	Undergraduate	Rural	4	4	4	4	3	3	4	3	4	4	4	3	4	4	4	4	4	3.5	3.83333	60
Female	Undergraduate	Rural	1	1	1	1	3	3	3	3	3	3	3	3	3	3	3	3	1	3	3	40
Female	Undergraduate	Rural	3	3	3	3	4	4	4	2	4	3	3	4	4	2	2	4	3	3.5	3.16667	52
Male	Undergraduate	Rural	4	4	3	4	4	3	4	2	3	2	3	4	2	2	3	2	3.75	3	2.66667	49
Female	Undergraduate	Rural	3	3	3	3	3	3	3	3	3	3	3	3	3	3	3	3	3	3	3	48
Female	Undergraduate	Rural	3	4	3	3	2	2	3	3	2	3	3	3	3	3	3	3	3.25	2.5	3	46
Female	Undergraduate	Rural	4	5	4	5	4	5	4	4	5	4	4	5	4	5	4	5	4.5	4.33333	4.5	71
Female	Undergraduate	Rural	4	4	4	4	4	4	4	4	4	4	3	3	3	2	2	2	4	4	2.5	55
Female	Undergraduate	Rural	5	5	5	5	5	5	5	5	5	5	5	5	5	5	5	5	5	5	5	80
Female	Undergraduate	Rural	4	4	4	4	4	4	4	4	4	4	3	3	3	3	3	3	4	4	3	58
Female	Undergraduate	Rural	4	4	4	4	3	4	3	4	3	4	3	4	3	4	3	4	4	3.5	3.5	58
Male	Undergraduate	Rural	3	3	3	3	3	3	3	3	3	3	3	3	3	3	3	3	3	3	3	48
Female	Undergraduate	Rural	5	5	1	4	2	2	2	2	4	4	3	3	3	3	3	3	3.75	2.66667	3	49
Male	Undergraduate	Rural	3	3	3	3	2	2	2	2	2	2	3	3	3	3	3	3	3	2	3	42
Female	Undergraduate	Urban	2	3	2	3	3	2	3	2	3	3	3	4	3	4	3	4	2.5	2.66667	3.5	47
Female	Undergraduate	Rural	3	3	4	2	4	3	2	4	4	3	4	4	4	4	4	4	3	3.33333	4	56
Female	Undergraduate	Urban	3	3	3	3	3	3	3	3	3	3	3	3	3	3	3	3	3	3	3	48
Female	Undergraduate	Urban	3	3	3	3	3	3	3	3	3	3	3	3	3	3	3	3	3	3	3	48
Female	Undergraduate	Urban	5	5	5	5	5	5	5	5	5	5	5	5	5	5	5	5	5	5	5	80
Female	Undergraduate	Rural	3	3	3	3	3	3	3	3	3	3	3	3	3	3	3	3	3	3	3	48
Female	Undergraduate	Urban	3	3	3	3	3	3	3	3	3	3	4	3	4	3	4	3	3	3	3.5	51
Female	Undergraduate	Urban	3	3	3	3	3	3	3	3	3	3	3	3	3	3	3	3	3	3	3	48
Female	Undergraduate	Rural	3	3	3	3	2	2	2	2	2	2	2	2	2	2	2	2	3	2	2	36
Female	Undergraduate	Rural	4	3	4	4	4	4	4	4	3	4	4	4	3	4	4	4	3.75	3.83333	3.83333	61
Female	Undergraduate	Rural	4	5	4	4	4	5	4	4	4	4	4	5	4	4	4	5	4.25	4.16667	4.33333	68
Female	Undergraduate	Rural	4	3	2	1	1	1	1	1	1	1	1	1	1	1	1	1	2.5	1	1	22
Female	Undergraduate	Urban	4	4	4	4	4	4	4	4	4	4	4	4	4	4	4	4	4	4	4	64
Female	Undergraduate	Rural	3	4	3	3	2	2	2	2	2	2	2	2	2	2	2	2	3.25	2	2	37
Female	Undergraduate	Rural	3	4	4	1	1	1	1	1	1	1	3	3	3	3	3	3	3	1	3	36
Male	Undergraduate	Urban	5	5	5	5	5	5	5	5	5	5	5	5	5	5	5	5	5	5	5	80
Female	Undergraduate	Urban	3	3	3	3	3	3	3	4	3	4	3	4	3	4	3	4	3	3.33333	3.5	53
Female	Undergraduate	Rural	4	4	4	4	4	4	4	4	4	4	4	4	4	4	4	4	4	4	4	64
Female	Undergraduate	Rural	3	3	3	3	3	2	2	2	2	3	2	2	2	2	2	2	3	2.33333	2	38
Male	Undergraduate	Rural	4	4	4	4	4	4	4	4	4	4	4	4	4	4	4	4	4	4	4	64
Female	Undergraduate	Rural	5	5	4	4	3	4	3	5	4	3	5	5	4	4	4	4	4.5	3.66667	4.33333	66
Female	Undergraduate	Rural	3	4	4	4	4	4	4	4	4	4	4	4	4	4	4	4	3.75	4	4	63
Female	Undergraduate	Rural	4	4	3	3	3	3	4	4	4	3	5	5	3	3	3	3	3.5	3.5	3.66667	57
Female	Undergraduate	Rural	3	3	3	3	3	3	3	3	3	3	3	3	3	3	3	4	3	3	3.16667	49
Female	Undergraduate	Urban	4	3	2	3	3	2	3	2	2	2	2	3	4	2	1	1	3	2.33333	2.16667	39
Female	Undergraduate	Rural	2	3	3	4	2	2	2	2	2	2	2	2	2	2	2	2	3	2	2	36
Female	Undergraduate	Rural	3	4	4	4	3	2	3	3	3	3	4	3	4	4	3	3	3.75	2.83333	3.5	53
Female	Undergraduate	Rural	4	4	4	4	4	4	4	4	4	4	4	4	4	4	4	4	4	4	4	64
Female	Undergraduate	Rural	4	3	4	4	3	4	4	4	4	4	4	3	4	4	3	4	3.75	3.83333	3.66667	60
Female	Undergraduate	Urban	4	4	4	4	4	4	4	4	4	4	4	4	4	4	4	4	4	4	4	64
Female	Undergraduate	Rural	4	3	3	3	3	2	4	3	3	3	3	3	3	3	3	3	3.25	3	3	49
Female	Undergraduate	Urban	4	4	4	4	3	3	3	3	3	3	3	3	3	3	3	3	4	3	3	52
Female	Undergraduate	Urban	4	4	4	4	4	3	4	3	4	4	4	4	4	4	4	4	4	3.66667	4	62
Female	Undergraduate	Rural	4	4	4	4	3	4	3	4	3	4	3	3	4	4	4	4	4	3.5	3.66667	59
Female	Undergraduate	Urban	4	3	3	3	2	2	2	2	2	2	2	2	2	2	2	2	3.25	2	2	37
Female	Undergraduate	Rural	4	3	4	4	4	4	3	4	4	4	4	4	3	4	3	3	3.75	3.83333	3.5	59
Female	Undergraduate	Rural	4	2	4	2	3	4	4	4	4	4	4	2	4	4	4	4	3	3.83333	3.66667	57
Female	Undergraduate	Urban	2	2	2	2	2	2	2	2	2	2	1	1	1	1	1	1	2	2	1	26
Female	Undergraduate	Rural	5	5	5	5	3	3	3	3	3	3	3	3	3	3	3	3	5	3	3	56
Female	Undergraduate	Rural	4	4	3	3	4	4	4	4	4	4	4	4	4	4	4	4	3.5	4	4	62
Female	Undergraduate	Rural	3	4	3	4	4	4	4	4	4	4	4	3	4	3	4	3	3.5	4	3.5	59
Male	Graduate	Urban	5	5	5	5	5	5	5	5	5	5	5	5	5	5	5	5	5	5	5	80
Female	Undergraduate	Rural	4	4	4	4	4	4	4	4	4	4	4	4	4	4	4	4	4	4	4	64
Female	Undergraduate	Rural	4	4	4	4	4	4	4	4	4	4	4	4	4	4	4	4	4	4	4	64
Female	Undergraduate	Rural	2	2	2	2	2	2	2	2	2	2	2	2	2	2	2	2	2	2	2	32
Male	Undergraduate	Rural	4	4	4	4	4	4	4	4	4	4	4	5	4	5	4	5	4	4	4.5	67
Female	Undergraduate	Rural	4	4	4	4	2	2	2	3	2	2	3	2	2	2	2	2	4	2.16667	2.16667	42
Female	Undergraduate	Rural	4	2	1	2	2	2	1	2	3	3	3	3	2	3	3	2	2.25	2.16667	2.66667	38
Female	Undergraduate	Urban	4	4	4	4	3	3	3	2	2	2	2	2	2	2	3	3	4	2.5	2.33333	45
Female	Undergraduate	Rural	3	3	3	3	3	3	3	3	3	3	3	3	3	3	3	3	3	3	3	48
Female	Undergraduate	Urban	3	3	3	4	3	3	2	2	3	3	2	2	2	2	2	2	3.25	2.66667	2	41
Female	Undergraduate	Rural	3	3	2	2	2	2	2	3	2	2	3	3	2	3	3	3	2.5	2.16667	2.83333	40
Female	Undergraduate	Rural	3	3	3	3	3	3	3	3	3	3	3	3	3	3	3	3	3	3	3	48
Male	Undergraduate	Rural	5	5	5	5	5	5	5	5	5	5	5	5	5	5	5	5	5	5	5	80
Male	Undergraduate	Rural	5	5	4	4	4	4	5	4	4	4	5	4	5	5	4	4	4.5	4.16667	4.5	70
Male	Undergraduate	Rural	5	5	5	5	5	5	5	5	5	5	5	5	5	5	5	5	5	5	5	80
Male	Undergraduate	Rural	5	5	5	5	5	5	5	5	5	5	5	5	5	5	5	5	5	5	5	80
Female	Undergraduate	Rural	3	4	3	3	2	2	2	2	3	2	2	3	3	3	3	3	3.25	2.16667	2.83333	43
Male	Undergraduate	Rural	3	2	2	3	3	2	3	3	3	3	4	4	4	4	4	2	2.5	2.83333	3.66667	49
Female	Undergraduate	Rural	2	2	2	2	2	2	2	2	2	2	1	1	1	1	1	1	2	2	1	26
Female	Undergraduate	Rural	4	3	3	4	2	2	3	3	3	3	3	3	3	3	3	3	3.5	2.66667	3	48
Male	Undergraduate	Urban	3	4	4	4	3	3	3	2	3	2	2	2	2	2	2	2	3.75	2.66667	2	43
Male	Undergraduate	Rural	4	3	3	3	2	2	4	4	3	2	3	4	4	3	3	3	3.25	2.83333	3.33333	50
Female	Undergraduate	Rural	3	3	3	3	3	3	3	3	3	3	3	3	3	3	3	3	3	3	3	48
Female	Undergraduate	Rural	4	4	4	4	4	4	3	4	4	4	3	3	3	3	3	3	4	3.83333	3	57
Male	Undergraduate	Rural	5	5	5	5	5	5	5	5	5	5	5	5	5	5	5	5	5	5	5	80
Male	Undergraduate	Rural	4	4	4	4	3	3	4	4	4	4	4	4	4	4	4	4	4	3.66667	4	62
Female	Undergraduate	Rural	3	2	2	4	2	3	4	2	4	3	4	3	3	3	3	2	2.75	3	3	47
Male	Undergraduate	Rural	4	4	4	4	4	4	4	4	4	4	4	4	4	4	4	4	4	4	4	64
Female	Undergraduate	Rural	4	4	4	3	3	2	3	3	3	2	3	2	2	3	2	2	3.75	2.66667	2.33333	45
Female	Undergraduate	Urban	3	3	3	3	3	3	3	3	3	3	3	3	3	3	3	3	3	3	3	48
Male	Undergraduate	Rural	3	4	3	4	3	4	3	4	4	3	3	4	3	3	4	3	3.5	3.5	3.33333	55
Female	Undergraduate	Rural	4	4	4	4	4	4	4	4	4	4	4	4	4	4	4	4	4	4	4	64
Female	Undergraduate	Rural	3	3	3	3	3	3	3	3	3	4	4	4	3	3	3	3	3	3.16667	3.33333	51
Female	Undergraduate	Urban	3	3	3	3	3	3	3	3	3	3	3	3	3	3	3	3	3	3	3	48
Female	Undergraduate	Rural	5	5	5	5	4	4	4	4	4	4	5	4	4	4	4	4	5	4	4.16667	69
Male	Undergraduate	Rural	4	4	4	4	4	4	4	4	4	4	4	4	4	4	4	4	4	4	4	64
Female	Undergraduate	Urban	4	4	4	4	1	1	1	1	1	3	1	4	2	2	3	3	4	1.33333	2.5	39
Female	Undergraduate	Urban	4	4	4	4	4	4	4	4	4	4	4	4	4	4	4	4	4	4	4	64
Female	Undergraduate	Rural	3	3	3	4	2	2	3	3	3	2	3	2	2	3	3	3	3.25	2.5	2.66667	44
Male	Undergraduate	Urban	4	4	3	3	4	3	4	4	4	3	4	4	4	4	4	4	3.5	3.66667	4	60
Male	Undergraduate	Rural	3	3	3	3	3	3	3	3	3	3	3	3	3	3	3	3	3	3	3	48
Male	Undergraduate	Rural	4	4	4	4	5	4	4	4	4	4	4	4	4	4	5	4	4	4.16667	4.16667	66
Male	Undergraduate	Rural	5	4	4	4	5	5	4	4	5	5	4	4	5	5	5	4	4.25	4.66667	4.5	72
Male	Undergraduate	Rural	4	3	4	3	3	3	3	4	4	4	3	4	4	3	4	4	3.5	3.5	3.66667	57
Male	Undergraduate	Rural	3	3	3	3	3	3	3	3	3	3	3	3	3	3	3	3	3	3	3	48
Female	Undergraduate	Urban	4	4	4	4	1	1	1	1	1	1	2	2	2	2	2	2	4	1	2	34
Male	Undergraduate	Urban	5	5	5	5	5	5	5	5	5	5	5	5	5	5	5	5	5	5	5	80
Male	Undergraduate	Rural	2	2	2	2	3	2	2	4	4	3	4	3	3	3	3	3	2	3	3.16667	45
Male	Undergraduate	Rural	3	3	3	3	3	3	3	3	3	3	3	3	3	3	3	3	3	3	3	48
Female	Undergraduate	Rural	2	2	2	2	2	2	2	2	2	2	2	2	2	2	2	2	2	2	2	32
Female	Undergraduate	Rural	4	3	3	3	3	3	3	3	3	3	3	3	3	3	3	3	3.25	3	3	49
Male	Undergraduate	Rural	5	5	5	5	5	5	5	5	5	5	5	5	5	5	5	3	5	5	4.66667	78
Female	Undergraduate	Rural	3	3	3	3	3	3	3	3	3	3	3	3	3	3	3	3	3	3	3	48
Female	Undergraduate	Rural	3	3	3	3	3	4	4	3	3	2	2	2	2	2	2	2	3	3.16667	2	43
Female	Undergraduate	Rural	5	5	5	5	5	5	5	5	5	5	5	5	5	5	5	5	5	5	5	80
Male	Undergraduate	Urban	2	2	2	2	2	2	2	2	2	2	2	2	2	2	2	2	2	2	2	32
Male	Undergraduate	Rural	3	3	3	3	3	3	3	3	3	3	3	3	3	3	3	3	3	3	3	48
Male	Undergraduate	Rural	5	5	5	5	5	5	5	5	5	5	5	5	5	5	5	5	5	5	5	80
Female	Undergraduate	Rural	4	4	4	4	2	2	2	2	2	2	2	2	2	2	2	2	4	2	2	40
Female	Undergraduate	Urban	5	5	5	5	5	5	5	5	5	5	5	5	5	5	5	5	5	5	5	80
Female	Undergraduate	Rural	4	4	4	4	4	4	4	4	4	4	4	4	4	4	4	4	4	4	4	64
Female	Undergraduate	Urban	5	5	5	5	4	3	3	4	3	2	4	5	5	5	5	5	5	3.16667	4.83333	68
Female	Undergraduate	Rural	3	4	3	3	2	3	3	3	3	3	3	3	3	4	3	3	3.25	2.83333	3.16667	49
Female	Undergraduate	Rural	3	3	4	3	3	3	2	3	3	3	4	3	4	3	3	3	3.25	2.83333	3.33333	50
Female	Undergraduate	Rural	3	3	3	3	3	3	3	3	3	3	3	3	3	3	3	3	3	3	3	48
Female	Undergraduate	Rural	3	4	3	2	3	2	3	4	3	2	3	2	2	2	4	3	3	2.83333	2.66667	45
Female	Undergraduate	Urban	4	4	4	4	4	4	4	4	4	4	4	4	3	3	3	3	4	4	3.33333	60
Female	Undergraduate	Urban	2	4	2	3	2	3	3	4	2	3	2	3	2	2	2	2	2.75	2.83333	2.16667	41
Female	Undergraduate	Rural	3	4	3	4	4	3	4	4	3	4	4	3	4	4	4	3	3.5	3.66667	3.66667	58
Female	Undergraduate	Urban	1	1	1	1	1	1	1	1	1	1	2	2	2	2	2	2	1	1	2	22
Male	Undergraduate	Urban	5	5	5	5	5	5	5	5	5	5	3	3	3	3	3	3	5	5	3	68
Male	Undergraduate	Rural	3	3	3	3	3	3	3	3	3	3	3	3	3	3	3	3	3	3	3	48
Female	Undergraduate	Urban	3	3	4	2	3	3	2	3	4	4	4	3	3	3	3	2	3	3.16667	3	49
Male	Undergraduate	Rural	3	3	3	3	3	3	3	3	3	3	3	3	3	3	3	3	3	3	3	48
Female	Undergraduate	Urban	4	4	4	4	4	4	4	4	4	4	4	4	4	4	4	4	4	4	4	64
Female	Undergraduate	Rural	3	3	3	3	3	3	3	3	3	3	3	3	3	3	3	3	3	3	3	48
Male	Undergraduate	Urban	2	2	2	2	2	3	3	2	3	2	3	2	4	4	4	2	2	2.5	3.16667	42
Male	Undergraduate	Urban	5	5	5	5	5	5	5	5	5	5	5	5	5	5	5	5	5	5	5	80
Male	Undergraduate	Rural	3	4	3	3	3	3	3	3	2	3	2	2	2	2	2	3	3.25	2.83333	2.16667	43
Male	Undergraduate	Rural	3	3	4	4	4	3	2	5	4	3	4	4	4	5	4	3	3.5	3.5	4	59
Female	Undergraduate	Rural	4	4	3	3	4	4	3	3	4	3	3	3	3	3	3	3	3.5	3.5	3	53
Male	Undergraduate	Rural	5	4	4	4	4	4	4	4	4	4	4	4	4	4	4	4	4.25	4	4	65
Female	Undergraduate	Rural	4	3	2	4	3	2	2	1	2	1	1	1	1	2	3	1	3.25	1.83333	1.5	33
Female	Undergraduate	Rural	3	3	3	3	3	3	3	3	3	3	3	3	3	3	3	3	3	3	3	48
Female	Undergraduate	Rural	5	5	5	5	2	2	2	2	2	2	2	2	2	2	2	2	5	2	2	44
Female	Undergraduate	Rural	3	3	3	3	3	3	3	3	3	3	3	3	3	3	3	3	3	3	3	48
Female	Undergraduate	Rural	5	5	5	5	5	4	4	4	3	4	4	4	4	4	4	4	5	4	4	68
Female	Undergraduate	Urban	3	2	3	2	2	2	2	2	2	2	2	2	3	2	2	3	2.5	2	2.33333	36
Female	Undergraduate	Urban	3	3	3	3	3	3	3	3	3	3	3	3	3	3	3	3	3	3	3	48
Female	Undergraduate	Rural	3	3	3	3	4	4	4	4	4	4	4	4	4	4	4	4	3	4	4	60
Female	Undergraduate	Rural	3	3	3	3	1	1	1	1	1	1	1	1	1	1	1	1	3	1	1	24
Female	Undergraduate	Rural	3	3	3	3	3	3	3	3	3	3	4	3	4	4	4	4	3	3	3.83333	53
Female	Undergraduate	Rural	4	4	4	4	4	3	4	4	4	4	4	3	4	3	3	4	4	3.83333	3.5	60
Male	Undergraduate	Rural	5	5	5	5	1	1	1	1	1	1	1	1	1	1	1	1	5	1	1	32
Female	Undergraduate	Urban	4	4	4	2	2	2	3	2	4	3	3	3	3	2	2	2	3.5	2.66667	2.5	45
Female	Undergraduate	Rural	2	2	2	2	3	3	3	3	3	3	3	3	3	3	3	3	2	3	3	44
Female	Undergraduate	Rural	4	4	4	4	4	4	4	4	4	4	4	4	4	4	4	4	4	4	4	64
Female	Undergraduate	Urban	4	3	3	4	4	3	4	4	4	4	4	3	4	4	3	4	3.5	3.83333	3.66667	59
Female	Undergraduate	Rural	4	4	4	4	1	1	1	1	1	1	1	1	1	1	1	1	4	1	1	28
Female	Undergraduate	Rural	4	2	4	4	2	2	2	2	2	2	3	3	2	2	2	2	3.5	2	2.33333	40
Female	Undergraduate	Rural	3	3	3	4	3	2	2	2	3	2	2	2	2	2	2	2	3.25	2.33333	2	39
Female	Undergraduate	Rural	3	3	3	3	3	3	3	3	3	3	2	2	2	2	2	2	3	3	2	42
Female	Undergraduate	Rural	3	3	3	3	3	3	3	3	3	3	3	3	3	3	3	3	3	3	3	48
Female	Undergraduate	Rural	4	4	4	4	4	4	4	4	4	4	4	4	4	4	4	4	4	4	4	64
Female	Undergraduate	Rural	3	3	3	3	3	3	3	3	3	3	3	3	3	3	3	3	3	3	3	48
Male	Undergraduate	Urban	4	4	4	4	2	2	4	2	2	2	2	2	2	2	2	2	4	2.33333	2	42
Female	Undergraduate	Rural	3	4	4	4	4	4	3	3	3	3	3	3	3	3	3	3	3.75	3.33333	3	53
Female	Undergraduate	Rural	4	4	4	4	4	4	4	4	4	4	4	4	4	4	4	4	4	4	4	64
Female	Undergraduate	Rural	3	3	3	3	3	3	3	3	3	3	3	3	3	3	3	3	3	3	3	48
Female	Undergraduate	Rural	3	3	3	3	3	3	3	3	3	3	3	3	3	3	3	3	3	3	3	48
Female	Undergraduate	Rural	4	4	4	4	3	3	3	3	3	3	3	3	3	3	3	3	4	3	3	52
Female	Undergraduate	Rural	4	4	4	4	4	4	4	4	4	4	3	3	3	3	3	3	4	4	3	58
Female	Undergraduate	Urban	4	4	4	4	2	2	2	2	2	2	2	2	2	2	2	2	4	2	2	40
Female	Undergraduate	Urban	3	3	4	4	3	3	3	3	3	3	3	3	4	3	3	3	3.5	3	3.16667	51
Female	Undergraduate	Rural	2	2	2	2	2	2	2	2	2	2	3	3	3	3	3	3	2	2	3	38
Male	Undergraduate	Urban	2	2	2	2	2	2	2	2	2	2	2	3	2	3	4	1	2	2	2.5	35
Female	Undergraduate	Rural	4	4	3	3	4	4	4	4	4	4	3	3	3	3	3	4	3.5	4	3.16667	57
Male	Graduate	Urban	1	1	1	1	1	1	1	1	1	1	1	1	1	1	1	1	1	1	1	16
Female	Undergraduate	Rural	3	3	3	3	3	3	3	3	3	3	3	3	3	3	3	3	3	3	3	48
Female	Graduate	Urban	4	5	5	2	2	1	2	4	5	5	4	2	4	4	4	5	4	3.16667	3.83333	58
Female	Undergraduate	Rural	4	4	3	4	4	5	4	5	4	4	5	4	5	4	5	4	3.75	4.33333	4.5	68
Female	Undergraduate	Rural	4	4	4	4	4	4	4	4	4	4	4	4	4	4	4	4	4	4	4	64
Male	Undergraduate	Rural	4	4	4	4	4	4	4	4	4	4	3	4	4	4	4	4	4	4	3.83333	63
Female	Undergraduate	Rural	3	3	3	3	3	3	3	3	3	3	3	3	3	3	3	3	3	3	3	48
Male	Undergraduate	Rural	5	5	5	5	1	1	1	1	1	1	1	1	1	1	1	1	5	1	1	32
Male	Undergraduate	Urban	5	5	5	5	5	5	5	5	5	5	5	5	5	5	5	5	5	5	5	80
Male	Undergraduate	Rural	3	3	3	3	3	3	3	3	3	3	3	3	3	3	3	3	3	3	3	48
Female	Undergraduate	Rural	2	2	2	2	2	2	2	2	2	2	3	3	3	3	3	3	2	2	3	38
Female	Undergraduate	Rural	3	3	3	3	3	3	4	3	3	3	3	3	3	3	3	3	3	3.16667	3	49
Female	Undergraduate	Rural	3	3	4	2	2	2	2	3	2	2	3	3	3	3	3	3	3	2.16667	3	43
Female	Undergraduate	Urban	4	4	4	3	4	4	3	4	4	4	4	4	3	3	3	3	3.75	3.83333	3.33333	58
Female	Undergraduate	Rural	4	4	3	3	4	4	4	4	4	4	4	4	4	4	4	4	3.5	4	4	62
Female	Graduate	Rural	1	1	1	1	1	1	1	1	1	1	1	1	1	1	1	1	1	1	1	16
Female	Undergraduate	Rural	3	3	3	2	2	2	2	2	3	3	4	4	4	4	4	4	2.75	2.33333	4	49
Male	Graduate	Urban	4	4	3	3	2	2	2	3	2	4	2	2	2	2	3	3	3.5	2.5	2.33333	43
Female	Undergraduate	Rural	1	1	1	1	1	1	1	1	1	1	1	1	1	1	1	1	1	1	1	16
Female	Undergraduate	Rural	4	4	4	4	4	4	4	4	4	4	4	4	4	4	4	4	4	4	4	64
Female	Undergraduate	Rural	4	5	4	4	4	4	4	4	4	3	5	5	5	5	5	5	4.25	3.83333	5	70
Female	Undergraduate	Rural	4	4	4	4	4	3	3	3	3	3	4	4	4	4	4	4	4	3.16667	4	59
Male	Undergraduate	Urban	3	3	3	3	3	3	3	3	3	3	3	3	3	3	3	3	3	3	3	48
Female	Undergraduate	Rural	4	4	5	4	4	5	4	4	5	4	4	5	5	4	5	5	4.25	4.33333	4.66667	71
Female	Undergraduate	Rural	2	3	2	4	4	3	3	2	3	2	4	3	2	3	2	2	2.75	2.83333	2.66667	44
Female	Undergraduate	Rural	3	3	3	3	2	2	2	2	2	2	2	2	2	2	2	2	3	2	2	36
Female	Undergraduate	Rural	4	4	4	4	4	4	4	4	4	4	4	4	4	4	4	4	4	4	4	64
Female	Undergraduate	Rural	5	5	5	5	5	5	5	5	5	5	5	5	5	5	5	5	5	5	5	80
Female	Undergraduate	Rural	5	5	5	5	5	5	5	5	5	5	5	5	5	5	5	5	5	5	5	80
Female	Undergraduate	Urban	5	5	5	5	5	5	5	5	5	5	5	5	5	5	5	5	5	5	5	80
Female	Undergraduate	Rural	3	4	4	4	4	4	4	4	4	4	3	4	4	4	4	4	3.75	4	3.83333	62
Female	Graduate	Urban	5	5	3	5	2	2	2	1	3	3	4	4	4	3	4	4	4.5	2.16667	3.83333	54
Female	Undergraduate	Rural	4	4	4	4	4	4	4	4	4	4	4	4	4	4	4	4	4	4	4	64
Female	Graduate	Urban	3	3	4	4	2	2	2	2	2	2	3	3	3	3	3	3	3.5	2	3	44
Female	Undergraduate	Rural	5	5	5	5	5	5	5	5	5	5	5	5	5	5	5	5	5	5	5	80
Male	Undergraduate	Urban	3	5	4	3	3	3	4	3	4	4	3	5	3	4	4	4	3.75	3.5	3.83333	59
Male	Undergraduate	Urban	3	2	4	2	4	2	3	3	3	4	4	2	4	3	4	2	2.75	3.16667	3.16667	49
Female	Undergraduate	Urban	5	5	5	5	4	3	3	3	3	3	4	4	4	4	4	3	5	3.16667	3.83333	62
Female	Undergraduate	Rural	5	5	5	5	3	3	3	3	3	3	3	3	3	3	3	3	5	3	3	56
Female	Undergraduate	Urban	4	3	3	3	4	4	4	4	4	4	3	3	3	3	3	3	3.25	4	3	55
Female	Undergraduate	Urban	3	3	3	3	3	3	3	3	3	3	3	3	3	3	3	3	3	3	3	48
Female	Undergraduate	Rural	4	4	5	5	4	5	4	5	4	5	5	4	5	4	5	4	4.5	4.5	4.5	72
Female	Undergraduate	Rural	4	4	4	4	4	4	4	4	4	4	4	4	4	4	4	4	4	4	4	64
Female	Undergraduate	Rural	3	3	3	3	3	3	3	3	3	3	3	3	3	3	3	3	3	3	3	48
Female	Undergraduate	Rural	3	4	4	3	2	2	2	2	3	3	2	3	3	2	2	2	3.5	2.33333	2.33333	42
Male	Undergraduate	Urban	4	4	4	4	4	4	4	4	4	4	2	2	2	2	2	2	4	4	2	52
Female	Undergraduate	Rural	4	4	4	4	4	4	4	4	4	4	4	4	4	4	4	4	4	4	4	64
Female	Undergraduate	Rural	4	4	4	4	4	4	4	4	4	4	3	3	3	3	3	3	4	4	3	58
Female	Graduate	Urban	3	3	3	3	3	3	3	3	3	3	3	3	3	3	3	3	3	3	3	48
Female	Undergraduate	Rural	3	3	3	3	3	3	3	3	3	3	3	3	3	3	3	3	3	3	3	48
Female	Undergraduate	Urban	4	4	4	4	4	4	4	4	4	4	4	4	4	4	4	4	4	4	4	64
Female	Undergraduate	Rural	5	5	5	5	4	4	3	3	2	2	4	4	4	4	4	4	5	3	4	62
Female	Undergraduate	Urban	4	4	4	4	4	4	4	4	4	4	4	4	4	4	4	4	4	4	4	64
Female	Undergraduate	Rural	4	3	4	3	4	3	3	3	4	3	4	3	3	4	3	3	3.5	3.33333	3.33333	54
Female	Undergraduate	Rural	4	5	5	4	4	5	5	5	4	4	5	5	4	5	4	5	4.5	4.5	4.66667	73
Male	Undergraduate	Rural	3	4	4	4	2	2	2	2	2	2	3	3	3	3	4	3	3.75	2	3.16667	46
Female	Undergraduate	Rural	4	2	2	2	2	3	3	3	3	3	3	4	3	3	3	3	2.5	2.83333	3.16667	46
Female	Undergraduate	Rural	4	4	4	4	4	4	4	4	4	4	4	4	4	4	4	4	4	4	4	64
Female	Undergraduate	Rural	4	3	3	4	4	4	4	3	4	3	4	4	3	3	4	4	3.5	3.66667	3.66667	58
Female	Undergraduate	Urban	4	3	4	4	3	4	5	5	4	4	2	3	3	4	4	4	3.75	4.16667	3.33333	60
Female	Undergraduate	Urban	2	3	3	1	3	1	2	1	2	2	2	2	2	2	2	2	2.25	1.83333	2	32
Female	Undergraduate	Urban	4	4	4	4	4	4	4	4	4	4	4	4	4	4	4	4	4	4	4	64
Female	Undergraduate	Rural	4	4	4	4	4	4	4	4	4	4	4	4	4	4	4	4	4	4	4	64
Female	Undergraduate	Urban	4	3	3	4	3	2	2	1	3	3	3	1	2	2	3	3	3.5	2.33333	2.33333	42
Female	Undergraduate	Rural	4	4	4	4	4	4	4	4	4	4	3	3	3	3	3	3	4	4	3	58
Female	Undergraduate	Rural	4	4	4	4	2	2	2	2	2	2	2	2	2	3	3	3	4	2	2.5	43
Female	Undergraduate	Urban	2	2	2	2	2	2	2	2	2	2	3	3	2	2	2	2	2	2	2.33333	34
Female	Undergraduate	Rural	3	3	3	3	3	3	3	4	3	4	3	3	3	3	3	2	3	3.33333	2.83333	49
Female	Undergraduate	Rural	4	4	4	4	4	4	4	4	4	4	4	4	4	4	4	4	4	4	4	64
Female	Undergraduate	Rural	3	3	2	3	3	3	3	3	3	3	3	3	3	3	3	3	2.75	3	3	47
Female	Undergraduate	Rural	3	3	3	4	3	4	4	4	4	4	4	4	4	4	4	4	3.25	3.83333	4	60
Female	Undergraduate	Urban	4	4	4	4	4	4	4	4	4	4	3	4	3	4	4	4	4	4	3.66667	62
Female	Undergraduate	Rural	3	2	2	2	3	3	2	3	3	2	3	3	3	3	3	3	2.25	2.66667	3	43
Female	Undergraduate	Rural	5	5	5	5	5	5	5	5	5	5	5	5	5	5	5	5	5	5	5	80
Female	Undergraduate	Rural	3	3	3	3	4	4	3	5	3	3	3	4	3	3	3	3	3	3.66667	3.16667	53
Female	Graduate	Urban	3	3	3	3	2	2	2	2	2	2	2	2	2	2	2	2	3	2	2	36
Male	Undergraduate	Rural	4	5	4	5	4	5	4	5	4	5	4	5	4	5	4	5	4.5	4.5	4.5	72
Male	Undergraduate	Rural	3	3	3	3	2	3	3	3	3	3	3	3	3	3	3	3	3	2.83333	3	47
Male	Undergraduate	Rural	4	4	4	4	4	4	4	4	4	4	4	4	4	4	4	4	4	4	4	64
Female	Undergraduate	Rural	2	3	2	3	3	4	4	3	4	4	4	3	4	3	3	4	2.5	3.66667	3.5	53
Female	Undergraduate	Urban	2	3	3	3	4	4	3	4	4	4	4	4	4	4	4	4	2.75	3.83333	4	58
Female	Undergraduate	Urban	4	4	4	4	4	4	4	4	4	4	1	1	4	4	1	1	4	4	2	52
Female	Undergraduate	Urban	4	4	4	4	4	4	4	4	4	4	4	4	4	4	4	4	4	4	4	64
Female	Undergraduate	Rural	3	3	3	3	3	3	3	3	3	3	3	3	3	3	3	3	3	3	3	48
Female	Undergraduate	Urban	5	5	5	5	5	5	5	5	5	5	5	5	5	5	5	5	5	5	5	80
Female	Undergraduate	Rural	5	5	5	5	5	5	5	5	5	5	5	5	5	5	5	5	5	5	5	80
Female	Undergraduate	Rural	4	4	4	4	4	4	4	4	4	4	4	4	4	4	4	4	4	4	4	64
Female	Undergraduate	Rural	3	3	3	3	3	3	3	3	3	3	3	3	3	3	3	3	3	3	3	48
Female	Undergraduate	Urban	4	4	4	4	4	4	4	4	4	4	4	4	4	4	4	4	4	4	4	64
Female	Undergraduate	Rural	4	4	4	4	4	4	4	4	4	4	4	4	4	4	4	4	4	4	4	64
Female	Undergraduate	Rural	3	3	3	3	3	3	3	3	3	3	3	3	3	3	3	3	3	3	3	48
Female	Undergraduate	Rural	3	3	3	3	3	3	3	3	3	3	3	3	3	3	3	3	3	3	3	48
Female	Undergraduate	Rural	4	4	4	4	4	4	4	4	4	4	4	4	4	4	4	4	4	4	4	64
Female	Undergraduate	Rural	3	3	3	3	3	3	3	3	3	3	3	3	3	3	3	3	3	3	3	48
Male	Undergraduate	Rural	4	4	4	4	4	4	4	4	4	4	4	4	4	4	4	4	4	4	4	64
Male	Graduate	Urban	2	2	2	2	2	2	2	2	2	2	2	2	2	2	2	2	2	2	2	32
Female	Undergraduate	Rural	3	4	4	4	4	4	4	4	4	4	4	4	4	4	4	4	3.75	4	4	63
Female	Undergraduate	Rural	4	4	4	4	4	4	4	4	4	4	4	4	4	4	4	4	4	4	4	64
Female	Undergraduate	Rural	1	1	1	1	1	2	4	1	1	2	3	3	3	3	3	1	1	1.83333	2.66667	31
Male	Undergraduate	Urban	3	3	3	3	2	3	3	3	4	4	1	1	2	3	1	1	3	3.16667	1.5	40
Female	Undergraduate	Rural	4	3	2	2	3	2	2	3	3	3	2	2	2	2	2	2	2.75	2.66667	2	39
Female	Undergraduate	Urban	5	5	5	5	4	4	4	4	4	4	4	4	4	4	4	4	5	4	4	68
Female	Undergraduate	Rural	4	4	4	4	1	1	1	1	1	1	2	2	2	2	2	2	4	1	2	34
Female	Undergraduate	Rural	3	3	3	3	3	3	3	3	3	3	3	3	3	3	3	3	3	3	3	48
Female	Undergraduate	Rural	3	3	3	3	3	3	3	3	3	3	3	3	3	3	3	3	3	3	3	48
Female	Undergraduate	Rural	3	3	3	2	5	3	2	5	3	3	5	5	5	5	4	4	2.75	3.5	4.66667	60
Female	Undergraduate	Rural	4	5	4	4	4	3	5	4	4	5	4	4	5	4	3	4	4.25	4.16667	4	66
Female	Undergraduate	Rural	4	5	4	4	4	4	4	5	4	3	3	4	3	3	4	3	4.25	4	3.33333	61
Female	Undergraduate	Rural	3	3	3	3	4	4	3	4	4	4	4	4	4	4	4	4	3	3.83333	4	59
Female	Undergraduate	Urban	2	3	3	3	3	3	3	3	3	3	4	3	3	3	3	4	2.75	3	3.33333	49
Female	Undergraduate	Urban	5	5	5	5	5	5	5	5	5	5	5	5	5	5	5	5	5	5	5	80
Male	Undergraduate	Urban	4	4	4	4	4	4	4	4	4	4	4	4	4	4	4	4	4	4	4	64
Female	Undergraduate	Urban	3	2	4	4	4	4	2	3	4	4	4	4	4	4	3	4	3.25	3.5	3.83333	57
Female	Undergraduate	Rural	4	4	4	4	4	4	4	4	4	4	4	4	4	4	4	4	4	4	4	64
Female	Undergraduate	Urban	4	4	4	4	4	4	4	4	4	4	4	4	4	4	4	4	4	4	4	64
Female	Undergraduate	Rural	4	3	2	3	2	2	3	3	3	3	3	3	3	3	3	3	3	2.66667	3	46
Female	Undergraduate	Urban	5	5	5	4	5	5	5	5	5	5	5	5	5	4	4	4	4.75	5	4.5	76
Male	Undergraduate	Urban	3	3	3	3	3	3	3	3	3	3	3	3	3	3	3	3	3	3	3	48
Female	Undergraduate	Rural	5	5	5	5	5	5	5	5	5	5	5	5	5	5	5	5	5	5	5	80
Female	Undergraduate	Rural	3	4	4	4	3	3	3	3	3	3	3	3	3	3	3	3	3.75	3	3	51
Female	Undergraduate	Urban	4	4	4	4	4	3	3	2	3	5	4	4	2	2	3	2	4	3.33333	2.83333	53
Female	Undergraduate	Urban	5	5	5	5	3	3	3	3	3	3	3	3	3	3	3	3	5	3	3	56
Male	Graduate	Urban	5	4	5	5	5	4	5	4	4	5	5	4	5	5	4	4	4.75	4.5	4.5	73
Female	Undergraduate	Rural	2	2	4	4	3	3	4	4	2	2	2	2	2	4	3	2	3	3	2.5	45
Female	Undergraduate	Rural	3	3	3	2	4	4	4	4	4	4	3	3	3	3	3	3	2.75	4	3	53
Female	Graduate	Urban	3	4	4	4	4	4	4	3	4	4	4	4	4	4	4	4	3.75	3.83333	4	62
Female	Undergraduate	Urban	3	3	4	5	2	2	3	3	4	4	3	2	2	2	3	3	3.75	3	2.5	48
Female	Undergraduate	Rural	4	3	3	3	3	3	3	3	3	3	4	4	3	3	4	3	3.25	3	3.5	52
Female	Undergraduate	Rural	2	2	2	1	2	1	1	3	3	2	4	3	3	2	2	2	1.75	2	2.66667	35
Female	Undergraduate	Rural	5	5	5	5	5	5	5	5	5	5	5	5	5	5	5	5	5	5	5	80
Male	Undergraduate	Urban	5	5	5	5	5	5	5	5	5	5	5	5	5	5	5	5	5	5	5	80
Female	Undergraduate	Urban	3	3	4	4	4	4	4	4	4	4	4	4	4	4	4	4	3.5	4	4	62
Male	Undergraduate	Rural	3	3	3	4	2	3	3	3	2	2	2	2	2	3	2	2	3.25	2.5	2.16667	41
Female	Undergraduate	Rural	3	3	3	2	3	3	3	2	2	2	3	3	3	2	2	3	2.75	2.5	2.66667	42
Female	Undergraduate	Urban	5	5	4	4	2	2	2	1	1	1	3	3	3	2	2	3	4.5	1.5	2.66667	43
Female	Undergraduate	Urban	4	4	2	3	1	2	2	2	4	3	4	3	3	3	3	3	3.25	2.33333	3.16667	46
Female	Undergraduate	Rural	3	3	3	3	3	3	3	3	3	3	3	3	3	3	3	3	3	3	3	48
Female	Undergraduate	Rural	4	4	4	4	3	3	3	4	3	2	3	4	3	3	3	3	4	3	3.16667	53
Female	Undergraduate	Urban	2	2	5	2	5	5	5	5	5	5	5	5	5	5	4	4	2.75	5	4.66667	69
Female	Undergraduate	Urban	3	3	4	4	5	4	5	4	4	4	4	4	4	4	4	4	3.5	4.33333	4	64
Female	Undergraduate	Rural	4	4	4	4	5	5	5	5	5	5	4	4	4	4	4	4	4	5	4	70
Female	Undergraduate	Urban	3	3	3	3	1	1	1	1	1	1	1	1	1	1	1	1	3	1	1	24
Female	Undergraduate	Urban	2	2	2	2	2	2	2	2	2	2	2	2	2	2	2	2	2	2	2	32
Female	Undergraduate	Rural	4	4	4	4	4	4	4	4	4	4	4	4	4	4	4	4	4	4	4	64
Female	Undergraduate	Rural	3	3	3	3	4	3	3	4	3	3	3	3	4	3	3	3	3	3.33333	3.16667	51
Female	Undergraduate	Rural	4	4	4	4	4	4	4	4	4	4	4	4	4	4	4	4	4	4	4	64
Male	Undergraduate	Rural	5	5	5	5	5	5	5	5	5	5	5	5	5	5	5	5	5	5	5	80
Female	Undergraduate	Rural	3	3	3	3	4	4	3	3	4	3	3	4	3	4	3	4	3	3.5	3.5	54
Female	Undergraduate	Rural	5	4	3	2	5	3	2	2	2	4	4	4	3	4	4	4	3.5	3	3.83333	55
Female	Undergraduate	Rural	4	3	2	3	4	3	4	3	4	4	3	4	4	3	4	4	3	3.66667	3.66667	56
Female	Undergraduate	Rural	4	3	4	5	5	4	3	5	3	5	5	4	3	4	4	3	4	4.16667	3.83333	64
Female	Undergraduate	Urban	3	4	4	4	3	3	3	3	3	3	3	3	3	3	3	3	3.75	3	3	51
Female	Undergraduate	Rural	3	3	3	3	3	3	3	3	3	3	3	3	3	3	3	3	3	3	3	48
Male	Undergraduate	Urban	2	2	2	2	2	2	2	2	2	2	2	2	2	2	2	2	2	2	2	32
Male	Undergraduate	Urban	3	2	2	2	3	3	3	3	3	3	4	3	3	3	3	3	2.25	3	3.16667	46
Female	Undergraduate	Rural	3	3	3	3	4	3	3	3	3	2	3	3	3	3	3	3	3	3	3	48
Female	Undergraduate	Rural	5	5	5	5	5	5	5	5	5	5	5	5	5	5	5	5	5	5	5	80
Female	Undergraduate	Urban	3	3	3	3	3	3	3	3	3	3	3	3	3	3	3	3	3	3	3	48
Female	Undergraduate	Rural	4	4	4	4	4	4	4	4	4	4	4	4	4	4	4	4	4	4	4	64
Female	Undergraduate	Rural	4	3	3	4	3	3	3	4	3	3	3	4	3	3	4	3	3.5	3.16667	3.33333	53
Female	Undergraduate	Urban	3	3	3	3	2	2	2	3	3	3	3	3	3	3	3	3	3	2.5	3	45
Female	Undergraduate	Rural	3	3	3	3	3	3	3	3	3	3	3	3	3	3	3	3	3	3	3	48
Female	Undergraduate	Rural	4	4	4	4	4	4	4	4	4	4	4	4	4	4	4	4	4	4	4	64
Female	Undergraduate	Urban	3	4	3	3	3	3	3	3	3	3	3	3	3	3	2	2	3.25	3	2.66667	47
Male	Undergraduate	Rural	3	3	3	3	3	3	3	3	3	3	3	3	3	3	3	3	3	3	3	48
Female	Undergraduate	Rural	4	5	4	5	2	2	2	3	3	2	4	2	4	3	3	3	4.5	2.33333	3.16667	51
Male	Undergraduate	Rural	5	5	5	5	5	5	5	5	5	5	5	5	5	5	4	5	5	5	4.83333	79
Female	Undergraduate	Rural	4	4	4	4	4	4	4	4	4	4	4	4	4	4	4	4	4	4	4	64
Male	Undergraduate	Rural	4	4	4	4	4	4	4	4	4	4	4	4	4	4	4	4	4	4	4	64
Male	Undergraduate	Rural	4	4	4	4	4	4	4	4	4	4	4	4	4	4	4	4	4	4	4	64
Male	Undergraduate	Rural	3	3	3	3	3	3	3	3	3	3	3	3	3	3	3	3	3	3	3	48
Male	Undergraduate	Rural	4	4	4	4	4	4	4	4	4	4	4	4	4	4	4	4	4	4	4	64
Male	Undergraduate	Rural	4	3	3	4	2	2	3	1	1	2	3	2	2	2	2	1	3.5	1.83333	2	37
Female	Undergraduate	Rural	2	2	2	2	2	2	2	2	2	2	2	2	2	2	2	2	2	2	2	32
Female	Undergraduate	Rural	4	4	3	3	4	4	4	4	4	4	4	4	4	4	4	4	3.5	4	4	62
Male	Undergraduate	Rural	3	3	3	3	3	3	3	3	3	3	3	3	3	3	3	3	3	3	3	48
Female	Undergraduate	Rural	4	4	4	4	4	4	4	4	4	4	4	4	4	4	4	4	4	4	4	64
Female	Undergraduate	Rural	3	3	3	3	3	3	3	3	3	3	3	3	3	3	3	3	3	3	3	48
Female	Undergraduate	Rural	1	1	1	1	1	1	1	1	1	1	1	1	1	1	1	1	1	1	1	16
Male	Undergraduate	Rural	3	3	3	3	3	3	3	3	3	3	3	3	3	3	3	3	3	3	3	48
Female	Undergraduate	Rural	3	3	3	3	3	3	3	4	3	3	3	3	3	3	3	3	3	3.16667	3	49
Female	Undergraduate	Rural	3	3	3	3	4	4	4	4	4	4	3	3	3	3	3	3	3	4	3	54
Female	Undergraduate	Rural	4	4	4	4	4	4	4	4	4	4	4	4	4	4	4	4	4	4	4	64
Male	Undergraduate	Urban	3	3	3	3	2	2	2	2	2	2	1	1	1	1	1	1	3	2	1	30
Female	Undergraduate	Rural	3	3	3	3	2	2	2	2	2	2	2	2	2	2	2	2	3	2	2	36
Female	Undergraduate	Rural	3	3	3	3	3	3	3	3	3	3	3	3	3	3	3	3	3	3	3	48
Female	Undergraduate	Rural	3	3	4	3	2	2	2	3	4	3	2	3	3	3	3	3	3.25	2.66667	2.83333	46
Female	Undergraduate	Rural	4	4	4	4	4	4	4	4	4	4	4	4	4	4	4	4	4	4	4	64
Female	Undergraduate	Rural	3	3	3	3	3	3	3	3	3	3	4	3	3	3	3	3	3	3	3.16667	49
Female	Undergraduate	Urban	4	5	3	4	1	1	1	1	1	1	4	4	3	3	3	3	4	1	3.33333	42
Female	Undergraduate	Rural	3	4	3	2	2	2	3	2	3	4	2	2	2	2	2	2	3	2.66667	2	40
Female	Undergraduate	Rural	4	4	4	4	4	4	4	4	4	4	4	4	4	4	4	4	4	4	4	64
Male	Undergraduate	Rural	5	4	4	4	4	3	4	3	4	3	4	4	3	4	3	4	4.25	3.5	3.66667	60
Female	Undergraduate	Rural	4	3	4	3	4	4	3	4	3	3	4	4	2	3	4	2	3.5	3.5	3.16667	54
Female	Undergraduate	Urban	3	3	3	3	3	3	3	4	3	3	3	3	4	4	4	4	3	3.16667	3.66667	53
Female	Undergraduate	Urban	5	5	5	5	5	5	5	5	5	5	5	5	5	5	5	5	5	5	5	80
Female	Undergraduate	Rural	4	4	4	4	4	4	4	4	4	4	4	4	4	4	4	4	4	4	4	64
Female	Undergraduate	Rural	4	3	4	4	4	2	3	2	3	2	4	4	4	4	4	2	3.75	2.66667	3.66667	53
Female	Undergraduate	Rural	3	3	3	2	3	3	3	2	3	3	3	3	3	3	3	3	2.75	2.83333	3	46
Male	Undergraduate	Rural	3	3	3	2	4	3	4	2	2	4	4	4	3	3	4	3	2.75	3.16667	3.5	51
Female	Undergraduate	Rural	3	3	3	3	3	3	3	3	3	3	3	3	3	3	3	3	3	3	3	48
Female	Undergraduate	Rural	3	3	3	3	3	3	3	3	3	3	3	3	3	3	3	3	3	3	3	48
Female	Undergraduate	Rural	3	3	3	3	2	2	2	2	2	2	2	2	2	2	2	2	3	2	2	36
Female	Undergraduate	Rural	4	4	4	4	4	4	4	4	4	4	2	2	2	2	2	2	4	4	2	52
Female	Graduate	Rural	2	2	2	2	2	2	2	3	3	3	2	2	2	2	2	2	2	2.5	2	35
Female	Undergraduate	Rural	3	3	3	3	3	3	3	3	3	3	3	3	3	3	3	3	3	3	3	48
Male	Undergraduate	Rural	4	4	4	4	2	2	2	2	2	2	2	2	2	2	2	2	4	2	2	40
Female	Graduate	Urban	5	5	5	5	5	5	5	5	5	5	5	5	5	5	5	5	5	5	5	80
Female	Undergraduate	Rural	3	3	3	3	2	2	2	2	2	2	3	3	3	3	3	3	3	2	3	42
Female	Undergraduate	Urban	4	4	4	4	4	4	4	4	4	4	4	4	4	4	4	4	4	4	4	64
Female	Undergraduate	Rural	3	3	3	3	3	3	3	3	3	3	3	3	3	3	3	3	3	3	3	48
Female	Undergraduate	Urban	5	5	5	5	1	1	1	1	1	1	1	1	1	1	1	1	5	1	1	32
Female	Undergraduate	Rural	3	3	3	3	3	2	2	2	2	2	2	3	2	2	2	2	3	2.16667	2.16667	38
Female	Undergraduate	Rural	5	5	5	5	5	5	5	5	5	5	5	5	5	5	5	5	5	5	5	80
Female	Undergraduate	Urban	4	4	4	4	4	4	4	4	4	4	4	4	4	4	4	4	4	4	4	64
Female	Undergraduate	Rural	5	5	5	5	4	4	4	4	4	4	4	4	4	4	4	4	5	4	4	68
Female	Undergraduate	Urban	2	4	2	2	2	2	4	2	4	3	2	2	4	4	2	2	2.5	2.83333	2.66667	43
Female	Undergraduate	Urban	4	4	4	4	4	4	4	4	4	4	3	4	2	3	3	3	4	4	3	58
Male	Undergraduate	Rural	5	5	5	5	5	5	5	4	5	5	4	5	5	5	5	5	5	4.83333	4.83333	78
Male	Undergraduate	Rural	5	5	5	5	5	5	5	5	5	5	5	5	5	5	5	5	5	5	5	80
Female	Undergraduate	Rural	3	4	4	4	4	4	4	4	4	4	4	4	3	3	3	3	3.75	4	3.33333	59
Female	Undergraduate	Rural	2	2	2	2	2	2	2	2	2	2	2	2	2	2	2	2	2	2	2	32
Female	Undergraduate	Rural	4	4	4	4	4	4	4	4	4	4	4	4	4	4	3	3	4	4	3.66667	62
Female	Undergraduate	Rural	5	5	5	5	5	5	5	5	5	5	5	5	5	5	5	5	5	5	5	80
Female	Undergraduate	Rural	5	5	5	5	5	5	5	5	5	5	5	5	5	5	5	5	5	5	5	80
Female	Undergraduate	Rural	3	2	2	3	1	1	1	1	1	1	1	1	1	1	1	1	2.5	1	1	22
Female	Undergraduate	Urban	5	5	5	4	3	3	3	3	3	3	3	3	3	3	3	3	4.75	3	3	55
Female	Undergraduate	Rural	4	4	4	4	4	4	4	4	4	4	4	4	4	4	4	4	4	4	4	64
Female	Undergraduate	Urban	4	4	4	4	4	4	4	4	4	4	3	3	3	4	4	4	4	4	3.5	61
Female	Undergraduate	Rural	3	3	3	3	3	3	3	3	3	3	3	3	3	3	3	3	3	3	3	48
Female	Undergraduate	Rural	5	4	5	4	5	4	5	5	5	4	4	4	5	4	5	4	4.5	4.66667	4.33333	72
Female	Undergraduate	Urban	3	4	3	4	4	3	4	3	4	4	4	3	4	4	3	4	3.5	3.66667	3.66667	58
Female	Undergraduate	Rural	5	4	5	5	3	3	3	3	3	2	3	3	3	2	2	3	4.75	2.83333	2.66667	52
Female	Undergraduate	Urban	4	4	4	3	4	4	4	3	4	4	3	4	4	3	4	4	3.75	3.83333	3.66667	60
Female	Undergraduate	Rural	4	4	4	4	4	4	4	4	4	4	4	4	4	4	4	4	4	4	4	64
Female	Undergraduate	Rural	4	4	4	4	4	4	4	4	4	4	2	2	2	2	2	2	4	4	2	52
Female	Undergraduate	Rural	4	3	3	4	4	3	3	3	4	3	4	4	3	3	4	3	3.5	3.33333	3.5	55
Female	Undergraduate	Rural	4	4	3	4	4	3	4	5	4	3	4	4	5	4	3	4	3.75	3.83333	4	62
Female	Undergraduate	Rural	4	4	3	4	3	3	2	2	2	1	3	3	3	4	4	3	3.75	2.16667	3.33333	48
Female	Undergraduate	Rural	4	3	3	3	4	3	3	3	4	3	3	4	4	3	4	4	3.25	3.33333	3.66667	55
Female	Undergraduate	Rural	4	4	4	4	3	3	3	3	3	3	4	3	3	4	3	4	4	3	3.5	55
Female	Undergraduate	Rural	4	4	4	4	3	3	3	3	3	3	3	3	3	3	3	3	4	3	3	52
Male	Undergraduate	Rural	3	3	3	3	3	3	3	3	3	3	3	3	3	3	3	3	3	3	3	48
Female	Undergraduate	Rural	3	3	4	3	3	3	3	3	3	3	3	4	4	4	4	4	3.25	3	3.83333	54
Female	Undergraduate	Rural	3	3	3	3	3	3	3	3	3	3	3	3	3	3	3	3	3	3	3	48
Male	Undergraduate	Rural	5	5	5	5	5	5	5	5	5	5	5	5	5	5	5	5	5	5	5	80
Female	Undergraduate	Rural	4	4	4	4	4	4	4	4	4	4	4	4	4	4	4	4	4	4	4	64
Female	Undergraduate	Rural	3	4	3	4	4	3	2	2	3	2	2	2	2	2	3	2	3.5	2.66667	2.16667	43
Female	Undergraduate	Rural	3	3	3	3	3	3	3	3	3	3	3	3	3	3	3	3	3	3	3	48
Female	Undergraduate	Rural	3	4	4	4	2	2	3	4	4	4	4	4	2	2	2	4	3.75	3.16667	3	52
Female	Undergraduate	Rural	2	3	3	2	1	1	1	2	2	2	1	1	2	1	2	2	2.5	1.5	1.5	28
Female	Undergraduate	Rural	2	1	2	3	2	2	1	2	2	3	3	2	1	3	2	1	2	2	2	32
Female	Undergraduate	Rural	3	3	3	3	3	3	3	3	3	3	3	3	3	3	3	3	3	3	3	48
Female	Undergraduate	Rural	3	2	2	2	3	2	2	2	2	3	3	3	3	3	3	3	2.25	2.33333	3	41
Female	Undergraduate	Rural	3	3	2	3	3	2	2	3	3	3	2	2	2	2	2	2	2.75	2.66667	2	39
Female	Undergraduate	Urban	1	1	1	1	1	1	1	1	1	1	1	1	1	1	1	1	1	1	1	16
Female	Undergraduate	Urban	4	2	3	3	4	3	3	4	4	4	3	4	3	4	4	4	3	3.66667	3.66667	56
Female	Undergraduate	Urban	3	3	3	3	3	3	3	3	3	3	3	3	3	3	3	3	3	3	3	48
Female	Undergraduate	Rural	4	4	4	3	1	1	1	1	1	1	1	1	1	1	1	1	3.75	1	1	27
Female	Undergraduate	Rural	3	2	2	2	2	2	2	2	2	2	3	2	2	3	3	3	2.25	2	2.66667	37
Female	Graduate	Urban	5	5	5	5	5	5	5	5	5	5	5	5	5	5	5	5	5	5	5	80
Female	Graduate	Urban	2	2	2	2	2	2	2	2	2	2	2	2	2	2	2	2	2	2	2	32
Male	Undergraduate	Rural	4	3	4	3	2	2	3	3	3	3	3	3	3	3	2	2	3.5	2.66667	2.66667	46
Male	Undergraduate	Rural	3	3	3	3	3	3	3	3	3	3	3	3	3	3	3	3	3	3	3	48
Male	Undergraduate	Rural	4	4	4	4	4	4	4	4	4	4	4	4	3	4	5	5	4	4	4.16667	65
Female	Graduate	Urban	2	4	2	4	2	2	3	2	2	2	2	2	3	3	4	2	3	2.16667	2.66667	41
Female	Undergraduate	Urban	4	4	4	4	4	4	4	4	4	4	4	4	4	4	4	4	4	4	4	64
Female	Undergraduate	Rural	2	2	1	1	2	2	1	3	3	2	3	2	1	1	2	2	1.5	2.16667	1.83333	30
Female	Graduate	Rural	5	5	4	4	4	3	4	4	4	4	5	5	4	4	4	4	4.5	3.83333	4.33333	67
Female	Graduate	Rural	4	4	4	4	4	4	4	4	4	4	4	4	4	4	4	4	4	4	4	64
Female	Undergraduate	Rural	3	3	3	3	2	2	2	3	3	3	2	4	3	3	4	2	3	2.5	3	45
Female	Undergraduate	Rural	2	2	2	2	3	4	3	3	3	3	3	3	3	3	3	3	2	3.16667	3	45
Female	Undergraduate	Rural	3	4	4	4	3	3	3	3	3	3	3	3	3	3	3	3	3.75	3	3	51
Male	Undergraduate	Rural	4	4	4	4	4	4	4	4	4	4	4	4	4	4	4	4	4	4	4	64
Male	Undergraduate	Urban	3	3	3	3	3	3	3	3	3	3	3	3	3	3	3	3	3	3	3	48
Male	Undergraduate	Rural	5	4	4	5	4	4	5	5	5	5	4	5	4	5	4	5	4.5	4.66667	4.5	73
Female	Undergraduate	Rural	5	5	5	5	5	5	5	5	5	5	5	5	5	5	5	5	5	5	5	80
Male	Undergraduate	Rural	5	5	5	5	5	5	5	5	5	5	5	5	5	5	5	5	5	5	5	80
Male	Undergraduate	Urban	3	3	3	3	3	3	3	3	3	3	3	3	3	3	3	3	3	3	3	48
Male	Undergraduate	Rural	4	5	4	5	4	5	4	5	4	5	4	5	4	4	5	4	4.5	4.5	4.33333	71
Male	Undergraduate	Rural	3	3	3	3	3	3	4	3	3	3	2	2	3	3	2	3	3	3.16667	2.5	46
Male	Undergraduate	Rural	3	4	3	4	4	3	4	4	4	3	3	3	3	3	4	3	3.5	3.66667	3.16667	55
Male	Undergraduate	Rural	5	5	5	5	4	5	4	5	4	5	4	5	4	5	4	5	5	4.5	4.5	74
Male	Undergraduate	Rural	4	5	4	4	4	4	4	4	4	4	4	4	4	4	4	4	4.25	4	4	65
Male	Undergraduate	Rural	4	4	4	4	4	4	4	4	4	4	4	4	4	4	4	4	4	4	4	64
Female	Undergraduate	Rural	4	4	3	3	2	2	2	2	2	2	2	2	2	2	2	2	3.5	2	2	38
Female	Undergraduate	Rural	5	5	5	5	5	5	5	5	5	5	5	5	5	5	5	5	5	5	5	80
Female	Undergraduate	Rural	4	4	4	4	4	4	4	4	4	4	4	4	4	4	4	4	4	4	4	64
Female	Undergraduate	Rural	2	2	2	2	2	2	2	3	3	2	2	2	3	2	2	2	2	2.33333	2.16667	35
Female	Undergraduate	Urban	2	2	2	2	4	4	4	4	4	4	4	4	4	2	2	2	2	4	3	50
Female	Undergraduate	Urban	3	3	3	2	2	3	2	3	2	1	2	2	3	2	1	2	2.75	2.16667	2	36
Male	Undergraduate	Urban	5	2	2	4	2	2	2	2	3	2	2	2	2	2	2	2	3.25	2.16667	2	38
Female	Undergraduate	Rural	4	4	4	4	4	4	4	4	4	4	3	3	3	3	3	3	4	4	3	58
Female	Undergraduate	Rural	5	2	4	5	5	2	4	4	5	5	5	4	4	3	4	4	4	4.16667	4	65
Female	Undergraduate	Rural	5	5	5	5	5	5	5	5	5	5	4	4	4	4	4	4	5	5	4	74
Female	Graduate	Urban	3	3	3	3	3	2	2	2	2	2	3	2	2	2	4	3	3	2.16667	2.66667	41
Female	Undergraduate	Rural	4	4	4	3	3	4	4	3	3	3	3	3	3	3	3	3	3.75	3.33333	3	53
Female	Undergraduate	Rural	4	3	3	5	3	3	3	3	3	3	4	4	4	4	3	4	3.75	3	3.83333	56
Female	Undergraduate	Rural	2	2	2	2	3	3	3	3	3	3	3	3	3	3	3	3	2	3	3	44
Female	Undergraduate	Urban	3	4	4	4	4	4	4	4	4	4	2	2	2	2	2	2	3.75	4	2	51
Female	Undergraduate	Urban	3	4	3	3	4	4	3	3	4	3	3	3	3	3	3	3	3.25	3.5	3	52
Female	Undergraduate	Rural	5	5	5	5	5	5	5	5	5	5	5	5	5	5	5	5	5	5	5	80
Male	Undergraduate	Rural	3	2	2	2	3	1	2	2	3	2	2	2	2	2	2	2	2.25	2.16667	2	34
Female	Undergraduate	Urban	4	2	2	2	3	3	4	3	4	3	2	2	2	2	2	2	2.5	3.33333	2	42
Female	Undergraduate	Rural	5	5	5	5	5	5	5	5	5	5	3	3	3	3	3	3	5	5	3	68
Female	Undergraduate	Rural	3	3	3	3	3	3	3	3	3	3	3	3	3	3	3	3	3	3	3	48
Female	Undergraduate	Urban	2	2	2	3	3	2	2	2	3	2	2	2	2	3	2	2	2.25	2.33333	2.16667	36
Male	Undergraduate	Rural	4	4	4	4	4	4	4	4	4	4	3	3	3	3	3	3	4	4	3	58
Male	Undergraduate	Rural	3	4	3	4	3	4	3	4	4	3	3	3	4	4	3	3	3.5	3.5	3.33333	55
Male	Undergraduate	Urban	3	2	3	2	2	3	4	3	3	3	2	2	2	2	2	3	2.5	3	2.16667	41
Male	Undergraduate	Rural	3	3	3	3	3	3	3	3	3	3	3	3	3	3	3	3	3	3	3	48
Male	Undergraduate	Urban	4	3	3	4	4	4	3	3	4	4	4	3	4	4	4	3	3.5	3.66667	3.66667	58
Male	Undergraduate	Rural	3	3	3	3	3	3	3	3	3	3	3	3	3	3	3	3	3	3	3	48
Male	Undergraduate	Rural	3	3	3	3	3	3	3	3	3	3	3	3	3	3	3	3	3	3	3	48
Female	Undergraduate	Rural	4	4	4	4	4	4	3	4	4	4	4	4	4	4	4	4	4	3.83333	4	63
Female	Undergraduate	Rural	4	4	4	4	4	4	4	4	4	4	4	4	4	4	4	4	4	4	4	64
Female	Undergraduate	Rural	4	4	4	4	5	3	2	4	4	4	4	4	4	4	4	4	4	3.66667	4	62
Female	Undergraduate	Urban	4	4	4	4	3	3	3	3	3	3	3	3	3	3	3	3	4	3	3	52
Female	Undergraduate	Urban	2	4	4	4	4	4	4	4	4	4	4	4	4	4	4	4	3.5	4	4	62
Female	Undergraduate	Urban	3	3	3	4	3	3	3	3	3	3	3	3	3	3	3	3	3.25	3	3	49
Female	Undergraduate	Rural	4	4	5	2	5	5	4	4	4	5	5	4	4	3	4	4	3.75	4.5	4	66
Female	Undergraduate	Rural	2	2	1	1	2	2	4	2	2	2	2	2	2	2	2	2	1.5	2.33333	2	32
Female	Undergraduate	Urban	2	2	2	2	1	1	1	1	1	1	1	1	1	1	1	1	2	1	1	20
Female	Undergraduate	Urban	4	4	4	4	3	3	3	2	3	3	4	4	4	4	4	4	4	2.83333	4	57
Female	Undergraduate	Rural	4	4	4	4	4	4	4	4	4	4	4	4	4	4	4	4	4	4	4	64
Female	Undergraduate	Urban	4	3	3	4	3	3	3	3	3	3	3	3	3	3	3	3	3.5	3	3	50
Male	Undergraduate	Urban	5	3	4	2	4	4	4	3	3	3	3	4	3	3	3	4	3.5	3.5	3.33333	55
Female	Undergraduate	Rural	4	3	5	2	4	2	4	4	5	4	5	4	3	4	4	5	3.5	3.83333	4.16667	62
Female	Undergraduate	Rural	2	2	2	2	2	2	2	2	2	2	2	2	2	2	2	2	2	2	2	32
Female	Undergraduate	Rural	3	3	3	3	3	3	3	3	3	3	3	3	3	3	3	3	3	3	3	48
Female	Undergraduate	Rural	4	3	2	2	2	2	4	2	2	1	2	2	2	4	1	2	2.75	2.16667	2.16667	37
Female	Undergraduate	Rural	5	5	5	5	4	4	4	4	4	4	4	4	4	4	4	4	5	4	4	68
Female	Undergraduate	Urban	2	2	2	2	1	1	1	1	1	1	1	1	1	1	1	1	2	1	1	20
Female	Undergraduate	Rural	3	3	3	3	3	3	3	3	3	3	3	3	3	3	3	3	3	3	3	48
Female	Undergraduate	Rural	1	1	1	1	1	1	1	1	1	1	1	1	1	1	1	1	1	1	1	16
Female	Undergraduate	Rural	5	5	5	5	5	5	5	5	5	5	5	5	5	5	5	5	5	5	5	80
Female	Undergraduate	Urban	4	4	4	4	4	4	4	4	4	4	4	4	4	4	4	4	4	4	4	64
