# Supplementary material for: Development and Validation of a Scale Assessing College Students’ Negative Attitudes Toward Generative AI-Assisted Academic Writing
Source: Research Square preprint supplement (doi:10.21203/rs.3.rs-6974623/v1), 2025-09-30
Supplement: Supplementary file 4 [file e758385a6bcab2729bdc2357.xlsx]

## Sheet: Sheet1
Sex	Education	BP	LH1	LH2	LH3	LH4	TO1	TO2	TO3	TO4	TO5	TO6	IA1	IA2	IA3	IA4	IA5	IA6	LH	TO	IA	Attitude
Female	Undergraduate	Rural	2	2	2	1	1	1	1	1	1	1	1	1	1	1	1	1	1.75	1	1	19
Male	Undergraduate	Rural	5	5	5	5	5	5	5	5	5	5	5	5	5	5	5	5	5	5	5	80
Female	Undergraduate	Rural	3	3	3	3	3	3	3	3	3	3	3	4	3	2	3	3	3	3	3	48
Female	Undergraduate	Rural	3	3	3	3	3	3	3	3	3	3	3	3	3	3	3	3	3	3	3	48
Male	Undergraduate	Rural	3	3	3	3	2	2	3	2	2	2	2	2	3	2	2	2	3	2.16667	2.16667	38
Female	Undergraduate	Urban	3	4	3	3	4	4	3	4	4	4	3	3	3	3	3	3	3.25	3.83333	3	54
Female	Undergraduate	Rural	4	4	4	4	3	3	3	5	5	5	5	5	5	5	5	5	4	4	5	70
Female	Undergraduate	Rural	4	4	4	4	3	4	4	4	4	4	3	3	3	3	4	3	4	3.83333	3.16667	58
Female	Undergraduate	Rural	5	3	5	2	5	4	3	4	4	4	4	3	3	4	4	4	3.75	4	3.66667	61
Female	Undergraduate	Urban	4	4	4	4	4	4	4	4	4	4	4	4	4	4	4	4	4	4	4	64
Female	Undergraduate	Rural	4	4	4	4	4	4	4	4	4	4	4	4	4	4	4	4	4	4	4	64
Male	Graduate	Urban	3	5	3	4	4	4	4	4	4	3	3	4	4	4	2	3	3.75	3.83333	3.33333	58
Female	Undergraduate	Rural	3	3	3	3	3	3	3	3	3	3	3	3	3	3	3	3	3	3	3	48
Female	Undergraduate	Urban	5	5	5	5	3	3	2	3	2	2	2	2	2	2	2	2	5	2.5	2	47
Female	Undergraduate	Urban	5	5	5	5	1	1	1	1	1	1	1	1	1	1	1	1	5	1	1	32
Male	Undergraduate	Urban	3	3	3	3	4	3	3	3	3	3	2	3	3	3	3	3	3	3.16667	2.83333	48
Female	Undergraduate	Rural	5	5	5	5	5	5	5	3	5	5	3	3	4	4	3	4	5	4.66667	3.5	69
Female	Undergraduate	Rural	4	3	4	4	3	3	3	3	4	3	3	3	3	4	4	4	3.75	3.16667	3.5	55
Female	Undergraduate	Urban	3	3	3	3	2	2	2	2	2	2	2	2	2	2	2	2	3	2	2	36
Female	Undergraduate	Urban	5	5	5	5	5	5	5	5	5	5	5	5	5	5	5	5	5	5	5	80
Female	Undergraduate	Rural	3	3	3	3	2	2	3	2	2	2	2	2	2	2	2	2	3	2.16667	2	37
Female	Graduate	Urban	4	4	4	4	4	4	4	4	4	4	4	4	4	4	4	4	4	4	4	64
Female	Undergraduate	Urban	5	5	5	5	5	5	5	5	5	5	5	5	5	5	5	5	5	5	5	80
Female	Undergraduate	Rural	3	3	2	3	2	2	3	3	2	2	4	3	4	2	4	3	2.75	2.33333	3.33333	45
Female	Undergraduate	Urban	3	3	3	3	3	3	3	3	3	3	3	3	3	3	3	3	3	3	3	48
Female	Undergraduate	Urban	3	3	3	3	3	3	3	3	3	3	3	3	3	3	3	3	3	3	3	48
Female	Undergraduate	Urban	5	5	5	5	3	3	3	2	2	2	3	3	3	3	3	3	5	2.5	3	53
Female	Undergraduate	Urban	4	3	2	3	3	3	3	3	3	3	2	2	2	2	2	2	3	3	2	42
Male	Undergraduate	Rural	5	5	5	5	5	5	5	5	5	5	5	5	5	5	5	5	5	5	5	80
Female	Undergraduate	Rural	3	3	3	3	3	3	3	3	3	3	3	2	2	2	2	2	3	3	2.16667	43
Female	Undergraduate	Rural	3	3	3	3	3	3	3	3	3	3	3	3	3	3	3	3	3	3	3	48
Female	Undergraduate	Urban	4	4	4	4	4	4	4	4	4	4	4	4	4	4	4	3	4	4	3.83333	63
Female	Undergraduate	Urban	3	3	3	3	2	2	2	2	2	2	2	2	2	2	2	2	3	2	2	36
Female	Undergraduate	Rural	4	4	4	4	4	4	4	4	4	4	4	4	4	4	4	4	4	4	4	64
Female	Undergraduate	Rural	1	1	1	5	1	1	1	1	1	1	5	5	5	5	5	5	2	1	5	44
Male	Undergraduate	Rural	3	3	3	3	3	3	3	3	3	3	3	3	3	3	3	3	3	3	3	48
Female	Undergraduate	Rural	3	3	3	3	3	3	3	3	3	3	3	3	3	3	3	3	3	3	3	48
Female	Undergraduate	Rural	3	3	3	3	3	3	3	3	3	3	3	3	3	3	3	3	3	3	3	48
Female	Undergraduate	Urban	3	3	2	2	2	2	2	2	2	2	2	2	2	2	2	2	2.5	2	2	34
Female	Undergraduate	Rural	3	2	2	2	2	2	3	1	2	1	4	3	2	3	3	3	2.25	1.83333	3	38
Female	Undergraduate	Rural	4	4	4	4	4	4	4	4	4	4	4	4	4	4	4	4	4	4	4	64
Female	Undergraduate	Rural	4	3	3	3	4	3	3	3	3	3	3	3	3	3	3	3	3.25	3.16667	3	50
Female	Undergraduate	Rural	2	2	2	2	2	2	2	2	2	2	2	2	2	2	2	2	2	2	2	32
Female	Undergraduate	Rural	1	1	1	1	1	1	1	1	1	1	1	1	1	1	1	1	1	1	1	16
Female	Undergraduate	Rural	4	4	4	4	4	4	4	4	4	4	4	4	4	4	4	4	4	4	4	64
Female	Undergraduate	Rural	3	3	3	3	3	3	3	3	3	3	3	3	3	3	3	3	3	3	3	48
Female	Undergraduate	Rural	3	4	4	4	4	4	4	4	4	4	4	4	4	4	4	4	3.75	4	4	63
Female	Undergraduate	Rural	4	4	4	4	3	3	3	3	3	3	4	4	4	3	3	3	4	3	3.5	55
Female	Undergraduate	Rural	4	4	4	4	4	4	4	4	4	4	4	4	4	4	4	4	4	4	4	64
Female	Graduate	Urban	2	2	2	2	2	2	2	2	2	3	2	1	1	1	2	1	2	2.16667	1.33333	29
Male	Undergraduate	Rural	3	3	3	3	3	3	3	3	3	3	3	3	3	3	3	3	3	3	3	48
Female	Undergraduate	Urban	3	3	4	4	4	4	3	3	3	3	3	3	3	3	3	3	3.5	3.33333	3	52
Female	Undergraduate	Rural	4	3	5	3	5	4	4	3	4	4	3	3	3	3	3	3	3.75	4	3	57
Female	Undergraduate	Rural	5	5	5	5	5	5	5	5	5	5	5	5	5	5	5	5	5	5	5	80
Female	Undergraduate	Rural	3	3	3	3	3	3	3	3	3	3	3	3	3	3	3	3	3	3	3	48
Female	Undergraduate	Rural	4	3	2	4	4	4	4	2	4	4	5	4	4	4	5	4	3.25	3.66667	4.33333	61
Female	Graduate	Urban	4	4	3	5	3	3	3	3	3	3	3	3	3	3	3	3	4	3	3	52
Female	Undergraduate	Rural	4	4	4	4	4	4	4	4	4	4	4	4	4	4	4	4	4	4	4	64
Female	Undergraduate	Rural	4	4	4	4	4	4	4	4	4	4	4	4	4	4	4	4	4	4	4	64
Female	Undergraduate	Rural	5	5	5	5	5	5	5	5	5	5	5	5	5	5	5	5	5	5	5	80
Female	Undergraduate	Rural	2	3	3	2	3	3	3	4	4	4	3	3	3	3	3	3	2.5	3.5	3	49
Female	Undergraduate	Rural	5	5	5	5	1	1	1	1	1	1	1	1	1	1	1	1	5	1	1	32
Female	Undergraduate	Rural	4	4	4	4	4	4	4	4	4	4	4	4	4	4	4	4	4	4	4	64
Female	Undergraduate	Urban	3	3	3	4	2	2	2	2	3	3	3	3	3	3	3	2	3.25	2.33333	2.83333	44
Female	Undergraduate	Urban	4	4	4	4	4	4	4	4	4	4	4	4	4	4	4	4	4	4	4	64
Female	Undergraduate	Rural	3	3	3	3	4	4	4	4	4	4	4	4	4	4	4	4	3	4	4	60
Female	Undergraduate	Urban	5	4	5	4	3	4	5	4	3	4	3	4	4	2	4	3	4.5	3.83333	3.33333	61
Female	Undergraduate	Rural	3	5	4	4	4	5	4	4	4	4	4	4	4	4	4	4	4	4.16667	4	65
Female	Undergraduate	Rural	4	4	4	4	4	4	4	4	4	4	4	4	4	4	4	4	4	4	4	64
Female	Undergraduate	Rural	3	4	4	4	3	3	3	3	3	3	3	3	3	3	3	3	3.75	3	3	51
Female	Undergraduate	Rural	4	3	2	4	3	3	3	4	3	3	3	2	4	4	3	3	3.25	3.16667	3.16667	51
Female	Undergraduate	Rural	5	5	5	5	5	5	5	5	5	5	5	5	5	5	5	5	5	5	5	80
Female	Undergraduate	Rural	4	4	4	4	2	2	2	2	2	2	2	2	2	2	2	2	4	2	2	40
Female	Undergraduate	Urban	5	5	5	5	5	5	5	5	5	5	5	5	5	5	5	5	5	5	5	80
Female	Undergraduate	Rural	3	3	3	2	4	3	3	3	3	3	3	4	4	4	3	4	2.75	3.16667	3.66667	52
Female	Undergraduate	Rural	4	4	4	4	4	4	4	4	4	4	4	4	4	4	4	4	4	4	4	64
Female	Undergraduate	Rural	2	2	2	2	3	2	3	2	2	2	2	2	2	2	2	2	2	2.33333	2	34
Female	Undergraduate	Rural	5	5	5	5	5	5	5	5	5	5	5	5	5	5	5	5	5	5	5	80
Female	Undergraduate	Urban	4	4	4	4	4	4	4	4	4	4	4	4	4	4	4	4	4	4	4	64
Female	Undergraduate	Rural	4	4	4	4	4	4	4	4	4	4	4	4	4	4	4	4	4	4	4	64
Female	Undergraduate	Rural	4	5	5	5	5	5	5	5	5	5	5	5	5	5	5	5	4.75	5	5	79
Female	Undergraduate	Rural	3	3	2	3	2	2	3	2	3	2	2	3	2	3	2	2	2.75	2.33333	2.33333	39
Female	Undergraduate	Rural	4	4	4	4	4	4	4	4	4	4	4	4	4	4	4	4	4	4	4	64
Female	Undergraduate	Urban	4	3	3	4	2	3	3	3	4	4	2	2	2	2	2	2	3.5	3.16667	2	45
Female	Undergraduate	Rural	3	3	4	4	2	2	2	4	4	3	3	3	4	3	4	3	3.5	2.83333	3.33333	51
Male	Undergraduate	Rural	3	3	3	3	3	3	3	3	3	3	3	3	3	3	3	3	3	3	3	48
Female	Undergraduate	Rural	4	4	3	3	3	3	4	3	3	3	4	4	4	4	3	3	3.5	3.16667	3.66667	55
Female	Undergraduate	Rural	4	4	4	4	2	2	2	2	2	2	2	2	2	2	2	2	4	2	2	40
Female	Undergraduate	Rural	3	3	3	3	3	3	3	3	3	3	3	3	3	3	3	3	3	3	3	48
Female	Undergraduate	Rural	2	4	3	2	2	2	2	2	2	2	2	2	2	2	2	2	2.75	2	2	35
Female	Undergraduate	Rural	3	3	3	3	3	3	3	3	3	3	3	3	3	3	3	3	3	3	3	48
Female	Undergraduate	Rural	4	4	4	4	4	4	4	4	4	4	4	4	4	4	4	4	4	4	4	64
Female	Graduate	Urban	2	2	2	2	1	1	1	1	1	1	1	1	1	1	1	1	2	1	1	20
Female	Undergraduate	Rural	5	3	4	5	3	3	3	3	3	3	4	4	5	4	4	4	4.25	3	4.16667	60
Female	Undergraduate	Urban	4	4	4	4	4	4	4	4	4	4	4	4	4	4	4	4	4	4	4	64
Female	Undergraduate	Urban	5	5	5	5	5	5	5	3	4	3	1	1	1	1	1	1	5	4.16667	1	51
Male	Undergraduate	Rural	4	4	3	3	3	3	3	3	3	3	3	3	3	3	3	3	3.5	3	3	50
Female	Undergraduate	Rural	3	3	3	3	3	3	3	3	3	3	3	3	3	3	3	3	3	3	3	48
Male	Undergraduate	Rural	4	4	4	4	2	3	4	2	2	3	3	3	3	3	3	3	4	2.66667	3	50
Female	Undergraduate	Rural	4	4	4	4	4	4	3	3	3	3	3	4	3	4	3	4	4	3.33333	3.5	57
Female	Graduate	Urban	3	4	4	3	3	2	2	3	4	3	3	2	3	2	2	2	3.5	2.83333	2.33333	45
Female	Undergraduate	Urban	4	4	4	4	4	4	4	4	4	4	3	3	3	3	3	3	4	4	3	58
Female	Undergraduate	Rural	4	2	4	4	2	2	3	3	2	2	2	2	2	3	4	4	3.5	2.33333	2.83333	45
Female	Undergraduate	Rural	3	3	3	3	2	2	2	2	2	3	2	2	2	3	3	3	3	2.16667	2.5	40
Female	Undergraduate	Rural	4	4	5	4	4	4	4	3	4	4	4	3	3	4	3	3	4.25	3.83333	3.33333	60
Female	Undergraduate	Urban	4	4	4	4	4	4	4	4	4	4	4	4	4	4	4	4	4	4	4	64
Female	Undergraduate	Rural	4	4	4	4	4	4	4	4	4	4	3	4	4	4	3	3	4	4	3.5	61
Male	Undergraduate	Rural	3	3	3	3	3	3	3	3	3	3	3	3	3	3	3	3	3	3	3	48
Female	Undergraduate	Rural	3	3	3	3	3	3	3	3	3	3	3	3	3	3	3	3	3	3	3	48
Female	Undergraduate	Rural	3	3	3	3	3	3	3	3	2	3	5	5	4	4	3	4	3	2.83333	4.16667	54
Female	Undergraduate	Urban	4	4	4	3	3	3	2	2	3	2	2	2	2	2	2	2	3.75	2.5	2	42
Female	Undergraduate	Rural	4	4	4	4	3	3	3	4	4	3	4	4	4	4	4	4	4	3.33333	4	60
Female	Undergraduate	Urban	5	5	3	3	3	3	3	3	3	3	1	5	5	1	4	2	4	3	3	52
Female	Undergraduate	Rural	3	3	3	3	3	3	3	3	3	3	3	3	3	3	3	3	3	3	3	48
Female	Undergraduate	Rural	4	4	4	4	4	4	4	4	4	4	4	4	4	4	4	4	4	4	4	64
Female	Undergraduate	Rural	4	4	4	4	4	4	4	4	4	4	3	2	2	3	3	3	4	4	2.66667	56
Female	Undergraduate	Rural	4	4	4	4	4	4	4	4	4	4	4	4	4	4	4	4	4	4	4	64
Female	Undergraduate	Rural	2	2	2	2	2	2	2	2	2	2	3	3	2	2	2	2	2	2	2.33333	34
Female	Undergraduate	Rural	4	4	3	3	3	2	2	2	2	2	2	2	2	2	2	3	3.5	2.16667	2.16667	40
Male	Undergraduate	Rural	2	2	2	2	2	3	3	3	3	2	2	2	2	2	2	2	2	2.66667	2	36
Female	Undergraduate	Rural	4	4	4	4	4	4	4	4	4	4	4	4	4	4	4	4	4	4	4	64
Female	Undergraduate	Rural	4	2	4	3	4	3	3	4	3	3	4	3	3	3	2	2	3.25	3.33333	2.83333	50
Female	Undergraduate	Rural	5	5	5	5	5	5	5	5	5	5	5	5	5	5	5	5	5	5	5	80
Female	Undergraduate	Rural	5	5	5	5	5	5	5	5	5	5	5	5	5	5	5	5	5	5	5	80
Female	Undergraduate	Rural	4	4	4	4	4	4	4	4	4	4	4	4	4	4	4	4	4	4	4	64
Female	Undergraduate	Urban	2	4	2	2	2	2	2	2	2	2	2	2	2	2	2	2	2.5	2	2	34
Female	Undergraduate	Rural	4	4	4	4	4	4	4	4	4	4	4	4	4	4	4	4	4	4	4	64
Female	Undergraduate	Rural	5	5	5	5	5	5	5	5	5	5	5	5	5	5	5	5	5	5	5	80
Female	Graduate	Urban	3	4	4	3	3	3	3	2	2	3	3	3	2	2	2	2	3.5	2.66667	2.33333	44
Female	Undergraduate	Rural	2	2	2	4	3	3	2	1	1	2	4	3	3	4	4	3	2.5	2	3.5	43
Male	Undergraduate	Rural	5	5	5	5	5	5	5	5	5	5	5	5	5	5	5	5	5	5	5	80
Female	Undergraduate	Rural	3	3	3	3	2	2	2	2	2	2	2	2	2	2	2	2	3	2	2	36
Male	Undergraduate	Rural	3	3	3	3	4	2	3	4	3	3	3	3	3	4	3	3	3	3.16667	3.16667	50
Female	Undergraduate	Rural	4	4	4	4	4	4	4	4	4	4	3	3	3	3	3	3	4	4	3	58
Female	Undergraduate	Rural	4	3	3	3	3	3	4	3	3	3	3	4	2	4	3	3	3.25	3.16667	3.16667	51
Female	Undergraduate	Rural	4	3	4	5	4	5	5	4	4	5	4	5	5	4	4	5	4	4.5	4.5	70
Female	Undergraduate	Rural	4	4	4	4	4	4	4	4	4	4	4	4	4	4	4	4	4	4	4	64
Female	Undergraduate	Rural	4	4	4	4	4	4	4	4	4	4	4	4	4	4	4	4	4	4	4	64
Female	Undergraduate	Rural	3	3	3	3	3	3	3	3	3	3	3	3	3	3	3	3	3	3	3	48
Female	Undergraduate	Urban	2	2	2	2	2	2	2	2	2	2	3	2	2	3	2	3	2	2	2.5	35
Female	Undergraduate	Urban	5	4	5	5	1	1	2	1	1	1	1	1	1	1	1	1	4.75	1.16667	1	32
Female	Undergraduate	Rural	4	4	3	2	4	4	4	4	4	3	4	3	4	4	3	3	3.25	3.83333	3.5	57
Female	Undergraduate	Rural	2	2	2	2	2	2	2	2	2	2	2	2	2	2	2	2	2	2	2	32
Female	Undergraduate	Urban	2	2	2	2	2	2	2	2	2	2	2	2	2	2	2	2	2	2	2	32
Female	Undergraduate	Urban	3	3	5	4	5	5	5	4	5	5	4	4	4	4	4	4	3.75	4.83333	4	68
Female	Undergraduate	Urban	5	5	5	5	5	5	5	5	5	5	5	5	5	5	5	5	5	5	5	80
Female	Undergraduate	Urban	4	4	4	4	2	2	2	2	2	2	2	2	2	2	2	2	4	2	2	40
Female	Graduate	Urban	1	1	1	1	2	2	2	2	2	2	2	2	2	2	2	2	1	2	2	28
Female	Undergraduate	Urban	3	3	2	3	3	3	3	4	3	4	3	3	4	4	4	4	2.75	3.33333	3.66667	53
Female	Undergraduate	Rural	4	4	4	4	3	3	3	3	3	3	3	3	3	3	3	3	4	3	3	52
Female	Undergraduate	Rural	3	3	3	3	3	3	3	3	3	3	3	3	3	3	3	3	3	3	3	48
Female	Undergraduate	Rural	3	3	3	3	3	4	3	4	4	3	3	3	3	3	3	3	3	3.5	3	51
Male	Undergraduate	Rural	3	3	3	3	2	2	2	2	2	2	3	3	3	3	3	3	3	2	3	42
Female	Undergraduate	Rural	3	3	4	3	4	3	4	3	3	4	4	4	3	3	3	4	3.25	3.5	3.5	55
Female	Undergraduate	Urban	3	3	4	3	3	3	3	4	3	3	4	4	3	4	4	4	3.25	3.16667	3.83333	55
Female	Undergraduate	Rural	2	2	2	2	1	1	1	1	2	3	3	3	3	3	3	3	2	1.5	3	35
Female	Graduate	Urban	5	5	5	5	5	5	5	5	5	5	2	2	2	2	2	2	5	5	2	62
Female	Undergraduate	Rural	2	2	2	2	4	3	3	3	3	3	3	3	3	3	3	3	2	3.16667	3	45
Female	Undergraduate	Rural	3	3	4	4	3	3	3	4	4	4	3	3	3	4	4	4	3.5	3.5	3.5	56
Female	Undergraduate	Rural	4	4	3	3	3	3	3	3	2	2	3	4	2	3	2	4	3.5	2.66667	3	48
Male	Undergraduate	Rural	4	4	4	4	4	4	4	4	4	4	3	4	4	4	4	3	4	4	3.66667	62
Female	Undergraduate	Urban	4	4	4	4	4	4	4	4	4	4	4	4	4	4	4	4	4	4	4	64
Male	Undergraduate	Rural	3	3	3	3	2	2	2	2	2	2	3	3	3	3	3	3	3	2	3	42
Male	Undergraduate	Urban	4	4	4	4	4	4	4	4	4	4	4	4	4	4	4	4	4	4	4	64
Female	Undergraduate	Rural	3	4	3	2	3	2	4	3	3	3	3	3	3	3	3	3	3	3	3	48
Male	Undergraduate	Rural	5	5	5	5	5	5	5	5	5	5	5	5	5	5	5	5	5	5	5	80
Female	Undergraduate	Rural	3	3	3	3	3	3	3	3	3	3	3	3	3	3	3	3	3	3	3	48
Male	Undergraduate	Rural	5	5	5	5	5	5	5	5	5	5	5	5	5	5	5	5	5	5	5	80
Male	Undergraduate	Rural	4	4	5	4	5	4	5	5	5	4	5	4	4	3	3	4	4.25	4.66667	3.83333	68
Male	Undergraduate	Rural	3	3	3	3	4	3	4	4	3	3	3	3	3	3	3	3	3	3.5	3	51
Female	Undergraduate	Rural	3	3	3	3	3	3	3	3	2	2	2	2	2	2	2	2	3	2.66667	2	40
Female	Undergraduate	Urban	3	3	3	3	3	3	3	3	3	3	3	3	3	3	3	3	3	3	3	48
Male	Undergraduate	Urban	3	3	3	3	3	3	4	3	3	3	4	2	4	3	3	3	3	3.16667	3.16667	50
Female	Undergraduate	Rural	4	4	4	5	4	4	4	4	4	4	4	4	4	5	5	5	4.25	4	4.5	68
Female	Undergraduate	Rural	4	4	4	4	4	4	4	4	4	4	4	4	4	4	4	4	4	4	4	64
Female	Undergraduate	Urban	3	2	2	2	2	2	2	2	2	2	3	3	4	3	3	4	2.25	2	3.33333	41
Female	Undergraduate	Rural	4	4	4	4	3	3	3	3	3	3	3	3	3	3	3	3	4	3	3	52
Female	Undergraduate	Rural	4	4	4	4	4	4	4	4	4	4	4	4	3	4	4	4	4	4	3.83333	63
Female	Undergraduate	Urban	2	2	2	2	2	2	1	2	3	2	1	1	1	2	2	3	2	2	1.66667	30
Female	Undergraduate	Rural	3	2	2	2	2	2	3	3	4	3	3	3	3	3	3	3	2.25	2.83333	3	44
Female	Undergraduate	Rural	4	4	4	4	4	4	4	4	4	4	4	4	4	4	4	4	4	4	4	64
Female	Undergraduate	Rural	4	4	4	4	3	3	3	3	3	3	3	3	3	3	3	3	4	3	3	52
Female	Undergraduate	Urban	4	3	4	4	4	3	4	4	3	3	4	4	4	3	4	3	3.75	3.5	3.66667	58
Female	Undergraduate	Rural	3	3	3	3	3	3	3	3	3	3	3	3	3	3	3	3	3	3	3	48
Female	Undergraduate	Rural	3	3	3	3	3	4	3	3	3	4	3	4	3	3	3	4	3	3.33333	3.33333	52
Female	Undergraduate	Rural	3	3	3	3	3	3	3	3	3	3	3	3	3	3	3	3	3	3	3	48
Male	Undergraduate	Urban	3	2	2	3	2	2	2	2	2	2	2	2	2	2	2	2	2.5	2	2	34
Female	Undergraduate	Rural	4	4	4	4	4	4	4	4	4	4	4	4	4	4	4	4	4	4	4	64
Female	Undergraduate	Rural	5	5	5	5	5	5	5	4	5	5	5	5	5	5	5	5	5	4.83333	5	79
Male	Undergraduate	Rural	3	3	3	3	3	3	3	3	3	3	3	3	3	3	3	3	3	3	3	48
Female	Undergraduate	Rural	3	3	3	3	3	3	3	3	3	3	3	3	3	3	3	3	3	3	3	48
Male	Undergraduate	Urban	4	4	4	4	4	4	4	4	4	4	4	4	4	4	4	4	4	4	4	64
Male	Graduate	Urban	3	3	3	3	5	5	5	5	5	4	5	5	5	5	5	5	3	4.83333	5	71
Male	Undergraduate	Rural	5	5	5	5	5	5	5	5	5	5	5	5	5	5	5	5	5	5	5	80
Female	Undergraduate	Rural	4	4	2	3	4	3	3	3	3	4	4	3	4	3	4	3	3.25	3.33333	3.5	54
Female	Undergraduate	Rural	3	3	4	4	4	4	4	3	4	4	3	4	3	4	3	4	3.5	3.83333	3.5	58
Female	Undergraduate	Rural	4	4	3	3	4	3	4	3	4	4	4	5	4	4	4	3	3.5	3.66667	4	60
Female	Undergraduate	Rural	3	3	4	4	4	3	3	4	4	4	4	4	4	4	3	4	3.5	3.66667	3.83333	59
Female	Undergraduate	Rural	3	4	3	4	2	2	3	3	2	3	4	3	3	2	3	4	3.5	2.5	3.16667	48
Male	Undergraduate	Rural	3	3	3	3	3	3	3	3	3	3	3	3	3	3	3	3	3	3	3	48
Male	Undergraduate	Urban	5	5	5	5	5	5	5	5	5	5	5	5	5	5	5	5	5	5	5	80
Female	Undergraduate	Urban	4	4	4	4	1	2	2	2	2	2	2	2	2	2	2	2	4	1.83333	2	39
Female	Undergraduate	Rural	5	5	5	5	5	5	5	5	5	5	5	5	5	5	5	5	5	5	5	80
Male	Undergraduate	Rural	5	5	5	5	5	5	5	5	5	5	5	5	5	5	5	5	5	5	5	80
Male	Undergraduate	Rural	3	3	3	3	4	4	4	4	4	4	4	4	4	4	4	4	3	4	4	60
Female	Undergraduate	Rural	3	4	4	3	2	3	3	2	3	3	2	2	2	2	2	2	3.5	2.66667	2	42
Female	Undergraduate	Urban	4	4	4	4	4	4	4	4	4	4	4	4	4	4	4	4	4	4	4	64
Female	Undergraduate	Urban	4	4	4	4	3	3	2	3	2	2	2	2	3	3	3	3	4	2.5	2.66667	47
Female	Undergraduate	Rural	3	3	3	3	3	3	3	3	3	3	3	3	3	3	3	3	3	3	3	48
Male	Undergraduate	Rural	5	4	4	5	4	4	4	4	4	4	4	5	4	5	4	4	4.5	4	4.33333	68
Female	Undergraduate	Rural	5	5	5	5	5	5	5	5	5	5	5	5	5	5	5	5	5	5	5	80
Female	Undergraduate	Rural	5	5	5	5	4	4	4	4	4	4	4	4	4	5	5	5	5	4	4.5	71
Female	Undergraduate	Rural	3	3	3	3	3	3	3	3	3	3	3	3	3	3	3	3	3	3	3	48
Female	Undergraduate	Rural	4	3	3	3	3	4	4	4	3	3	4	3	4	4	3	3	3.25	3.5	3.5	55
Female	Undergraduate	Rural	2	2	2	1	2	3	3	2	3	3	3	4	3	3	3	3	1.75	2.66667	3.16667	42
Female	Undergraduate	Rural	3	3	3	3	2	3	4	2	2	2	2	2	2	2	2	2	3	2.5	2	39
Female	Undergraduate	Urban	5	5	5	5	5	5	5	5	5	5	5	5	5	5	5	5	5	5	5	80
Female	Undergraduate	Rural	3	3	3	3	3	3	3	3	3	3	3	3	3	3	3	3	3	3	3	48
Female	Undergraduate	Rural	5	3	4	4	3	4	2	4	4	3	4	3	4	3	4	4	4	3.33333	3.66667	58
Female	Undergraduate	Urban	3	4	2	4	3	4	2	4	3	3	4	4	4	4	4	4	3.25	3.16667	4	56
Female	Undergraduate	Rural	3	3	3	3	3	3	3	3	3	3	3	3	3	3	3	3	3	3	3	48
Female	Undergraduate	Rural	5	5	5	5	1	5	5	5	5	5	4	4	4	5	4	4	5	4.33333	4.16667	71
Female	Undergraduate	Rural	5	5	5	5	3	3	5	3	3	3	3	3	3	3	3	3	5	3.33333	3	58
Male	Undergraduate	Rural	5	5	5	5	5	5	5	5	5	5	5	5	5	5	5	5	5	5	5	80
Female	Undergraduate	Rural	3	3	3	3	2	1	3	3	3	3	3	3	2	3	3	3	3	2.5	2.83333	44
Female	Undergraduate	Urban	4	4	3	3	3	3	3	3	3	3	3	3	3	3	3	3	3.5	3	3	50
Female	Undergraduate	Rural	4	4	4	4	4	4	4	4	4	4	4	4	4	4	4	4	4	4	4	64
Female	Undergraduate	Rural	4	4	4	4	4	4	4	4	4	4	4	4	4	4	4	4	4	4	4	64
Female	Undergraduate	Rural	4	4	4	4	2	2	4	4	4	4	2	4	3	3	3	3	4	3.33333	3	54
Female	Undergraduate	Rural	4	4	4	4	4	4	4	4	4	4	4	4	4	4	4	4	4	4	4	64
Female	Undergraduate	Rural	5	4	4	4	1	1	1	1	3	2	4	4	4	5	3	3	4.25	1.5	3.83333	49
Female	Undergraduate	Rural	5	5	5	5	5	5	5	5	5	5	5	5	5	5	5	5	5	5	5	80
Female	Undergraduate	Rural	3	3	2	2	2	2	2	2	2	3	2	2	3	2	2	2	2.5	2.16667	2.16667	36
Female	Undergraduate	Rural	5	3	4	3	2	2	1	2	2	1	2	2	1	1	1	1	3.75	1.66667	1.33333	33
Female	Undergraduate	Rural	3	3	3	3	3	3	4	3	3	3	3	3	3	3	3	3	3	3.16667	3	49
Female	Undergraduate	Rural	3	3	3	4	4	4	3	3	4	3	3	3	3	3	3	3	3.25	3.5	3	52
Female	Undergraduate	Urban	3	3	3	3	3	3	3	3	3	3	3	3	2	3	3	3	3	3	2.83333	47
Female	Undergraduate	Rural	3	3	3	3	3	3	3	3	3	3	3	3	3	3	3	3	3	3	3	48
Female	Undergraduate	Rural	3	3	3	3	4	3	3	4	3	4	3	4	3	3	4	3	3	3.5	3.33333	53
Female	Graduate	Urban	1	1	1	1	1	1	1	1	1	1	1	1	1	1	1	1	1	1	1	16
Male	Undergraduate	Rural	4	4	4	3	2	2	3	3	3	3	3	3	3	3	2	2	3.75	2.66667	2.66667	47
Male	Undergraduate	Urban	4	4	5	4	4	5	5	4	5	5	4	4	5	4	4	5	4.25	4.66667	4.33333	71
Female	Undergraduate	Urban	3	4	4	3	4	4	4	4	3	3	4	4	4	3	4	4	3.5	3.66667	3.83333	59
Female	Undergraduate	Rural	4	4	4	4	4	4	4	4	4	3	4	4	4	4	4	4	4	3.83333	4	63
Female	Undergraduate	Rural	3	3	3	3	3	3	3	3	3	3	3	3	3	3	3	3	3	3	3	48
Female	Undergraduate	Rural	3	3	3	3	3	3	3	3	3	3	5	5	3	4	4	4	3	3	4.16667	55
Female	Undergraduate	Urban	3	3	3	3	3	3	3	4	4	4	3	3	3	3	3	3	3	3.5	3	51
Female	Undergraduate	Rural	3	4	4	3	2	2	3	4	2	3	2	3	4	3	3	2	3.5	2.66667	2.83333	47
Female	Undergraduate	Rural	4	4	4	4	4	4	4	4	4	4	4	4	4	4	4	4	4	4	4	64
Female	Undergraduate	Rural	4	4	3	4	3	3	2	3	3	2	3	3	3	3	3	2	3.75	2.66667	2.83333	48
Male	Undergraduate	Rural	3	3	3	3	3	3	3	3	3	3	1	1	3	3	2	2	3	3	2	42
Male	Undergraduate	Rural	3	3	3	3	3	3	3	4	4	3	3	3	3	4	3	3	3	3.33333	3.16667	51
Male	Undergraduate	Rural	3	4	2	3	3	3	3	4	3	4	3	4	3	4	3	4	3	3.33333	3.5	53
Female	Undergraduate	Rural	3	4	4	2	4	3	3	4	4	3	3	3	3	3	3	3	3.25	3.5	3	52
Female	Undergraduate	Rural	4	3	3	4	3	4	3	3	4	4	3	4	3	3	3	4	3.5	3.5	3.33333	55
Female	Undergraduate	Urban	4	4	4	4	4	4	4	4	4	4	4	4	4	4	4	4	4	4	4	64
Female	Graduate	Urban	4	4	5	5	5	5	4	5	5	5	4	4	4	5	4	5	4.5	4.83333	4.33333	73
Female	Undergraduate	Rural	4	4	3	2	2	2	2	2	2	2	2	3	2	2	3	2	3.25	2	2.33333	39
Male	Undergraduate	Rural	4	4	4	4	4	4	4	4	4	4	4	4	4	4	4	4	4	4	4	64
Female	Undergraduate	Rural	1	1	1	1	1	1	1	1	2	2	3	2	3	3	2	2	1	1.33333	2.5	27
Female	Undergraduate	Urban	4	3	3	3	3	3	3	3	3	4	3	3	3	3	3	3	3.25	3.16667	3	50
Male	Undergraduate	Urban	3	3	3	3	3	3	3	3	3	3	3	3	3	3	3	3	3	3	3	48
Female	Undergraduate	Rural	4	3	3	3	3	3	3	3	3	3	3	3	3	3	2	2	3.25	3	2.66667	47
Female	Undergraduate	Urban	5	5	5	5	5	5	5	5	5	5	5	5	5	5	5	5	5	5	5	80
Male	Undergraduate	Urban	4	4	4	4	4	4	4	4	4	4	4	4	4	4	4	4	4	4	4	64
Female	Graduate	Rural	4	4	4	4	2	3	3	4	4	4	3	3	4	4	4	4	4	3.33333	3.66667	58
Male	Undergraduate	Rural	3	3	3	3	2	3	3	3	3	3	3	3	3	3	3	3	3	2.83333	3	47
Female	Graduate	Urban	3	3	3	3	2	1	3	2	2	2	2	2	1	2	3	3	3	2	2.16667	37
Female	Undergraduate	Urban	1	1	1	1	1	1	1	1	1	1	1	1	1	1	1	1	1	1	1	16
Female	Undergraduate	Rural	5	4	3	3	3	3	3	3	3	3	3	3	3	3	3	3	3.75	3	3	51
Female	Undergraduate	Urban	4	4	4	4	4	4	4	4	3	4	4	4	4	4	4	4	4	3.83333	4	63
Female	Undergraduate	Rural	4	3	3	3	2	3	3	4	4	4	3	3	3	3	3	3	3.25	3.33333	3	51
Male	Undergraduate	Urban	4	4	5	4	4	5	4	4	5	4	4	3	4	3	4	5	4.25	4.33333	3.83333	66
Female	Undergraduate	Rural	4	4	4	4	4	4	4	4	4	4	4	4	4	4	4	4	4	4	4	64
Female	Undergraduate	Urban	3	3	4	4	3	3	4	4	4	4	4	4	4	4	4	4	3.5	3.66667	4	60
Female	Undergraduate	Rural	3	3	3	3	3	3	3	3	3	3	3	3	3	3	3	3	3	3	3	48
Female	Undergraduate	Rural	4	3	3	2	4	2	2	3	3	3	3	3	3	3	3	3	3	2.83333	3	47
Female	Undergraduate	Rural	3	3	3	3	3	3	3	3	3	3	3	3	3	3	3	3	3	3	3	48
Female	Undergraduate	Rural	3	4	4	3	4	3	4	3	3	4	4	4	3	4	4	4	3.5	3.5	3.83333	58
Female	Undergraduate	Rural	3	3	3	3	2	2	2	2	2	2	2	2	2	2	2	2	3	2	2	36
Female	Undergraduate	Rural	3	4	2	2	2	2	2	3	4	2	2	2	2	2	2	2	2.75	2.5	2	38
Female	Undergraduate	Rural	3	3	3	3	3	3	3	3	3	3	3	3	3	3	3	3	3	3	3	48
Female	Undergraduate	Urban	2	3	4	2	2	4	3	2	4	4	2	3	3	2	4	2	2.75	3.16667	2.66667	46
Female	Undergraduate	Rural	4	4	4	4	3	3	3	3	3	3	3	3	3	3	3	3	4	3	3	52
Male	Undergraduate	Rural	4	3	2	2	1	1	5	1	1	1	4	2	3	3	1	1	2.75	1.66667	2.33333	35
Male	Undergraduate	Rural	5	5	5	5	5	5	5	5	5	5	5	5	5	5	5	5	5	5	5	80
Male	Undergraduate	Urban	4	3	3	3	3	3	3	3	3	3	3	3	3	3	3	3	3.25	3	3	49
Male	Undergraduate	Rural	5	5	5	5	5	5	5	5	5	5	4	4	4	3	3	3	5	5	3.5	71
Female	Undergraduate	Urban	5	5	5	5	5	5	5	5	5	5	5	5	5	5	5	5	5	5	5	80
Female	Undergraduate	Rural	3	3	3	3	2	2	3	2	2	2	2	2	3	3	3	2	3	2.16667	2.5	40
Male	Undergraduate	Urban	3	3	4	4	4	4	4	4	4	4	4	4	4	4	4	4	3.5	4	4	62
Female	Undergraduate	Rural	4	4	4	4	4	4	4	4	4	4	4	4	4	4	4	4	4	4	4	64
Female	Undergraduate	Urban	3	4	3	4	3	3	4	4	3	3	2	3	4	4	3	3	3.5	3.33333	3.16667	53
Male	Undergraduate	Rural	3	3	2	3	4	3	4	3	3	4	3	3	3	2	3	4	2.75	3.5	3	50
Female	Undergraduate	Urban	4	4	4	4	4	4	4	4	4	4	4	4	4	4	4	4	4	4	4	64
Male	Undergraduate	Urban	2	2	2	2	2	2	2	2	2	2	4	2	2	2	2	2	2	2	2.33333	34
Female	Undergraduate	Urban	3	3	3	3	3	3	3	3	3	3	4	4	3	3	4	3	3	3	3.5	51
Female	Undergraduate	Urban	3	4	4	3	4	4	3	5	5	5	4	4	4	4	4	4	3.5	4.33333	4	64
Female	Undergraduate	Rural	4	4	4	4	4	4	4	4	4	4	4	4	4	4	4	4	4	4	4	64
Female	Undergraduate	Rural	3	3	4	4	4	4	4	4	4	3	3	4	3	3	3	3	3.5	3.83333	3.16667	56
Female	Undergraduate	Rural	4	4	4	4	4	4	4	4	4	4	4	4	4	4	4	4	4	4	4	64
Female	Undergraduate	Urban	3	4	4	3	4	3	2	4	4	4	4	4	4	4	4	4	3.5	3.5	4	59
Female	Undergraduate	Rural	3	3	3	3	3	3	3	3	3	3	3	3	3	3	3	3	3	3	3	48
Female	Undergraduate	Rural	3	3	3	3	2	2	2	2	2	2	2	2	2	2	2	2	3	2	2	36
Female	Undergraduate	Rural	3	3	3	3	3	3	3	3	3	3	3	3	3	3	3	3	3	3	3	48
Female	Undergraduate	Rural	3	4	3	4	3	3	3	3	3	3	3	3	3	3	3	3	3.5	3	3	50
Female	Undergraduate	Rural	5	5	5	5	5	5	5	5	5	5	5	5	5	5	5	5	5	5	5	80
Female	Undergraduate	Rural	4	3	3	2	2	2	2	2	4	4	4	4	4	4	4	4	3	2.66667	4	52
Female	Undergraduate	Rural	4	4	4	4	4	4	4	4	4	4	4	4	4	4	4	4	4	4	4	64
Female	Undergraduate	Urban	3	3	3	3	3	3	4	4	3	3	4	4	3	4	3	3	3	3.33333	3.5	53
Female	Undergraduate	Rural	3	3	3	3	3	3	3	3	3	3	3	3	3	3	3	3	3	3	3	48
Female	Undergraduate	Urban	4	4	4	4	4	4	4	4	4	4	4	4	4	4	4	4	4	4	4	64
Female	Undergraduate	Urban	4	3	3	4	2	3	2	2	4	4	4	4	4	4	4	4	3.5	2.83333	4	55
Female	Undergraduate	Urban	3	3	3	3	3	3	3	3	3	3	3	3	3	3	3	3	3	3	3	48
Female	Undergraduate	Rural	3	4	3	3	4	4	4	4	4	4	4	4	4	4	4	4	3.25	4	4	61
Female	Undergraduate	Rural	4	4	3	3	3	4	4	4	4	3	4	4	4	4	4	4	3.5	3.66667	4	60
Female	Undergraduate	Rural	3	2	4	4	2	3	3	3	3	3	4	4	4	4	4	4	3.25	2.83333	4	54
Female	Undergraduate	Rural	3	3	3	3	3	3	4	4	4	4	3	4	4	3	4	3	3	3.66667	3.5	55
Female	Undergraduate	Rural	4	4	4	4	3	3	3	3	3	3	3	3	3	3	3	3	4	3	3	52
Female	Undergraduate	Urban	1	1	1	1	1	1	1	1	1	1	1	1	1	1	1	1	1	1	1	16
Female	Undergraduate	Urban	4	4	4	4	4	4	4	4	4	4	4	4	4	4	4	4	4	4	4	64
Female	Undergraduate	Rural	3	3	3	4	3	4	3	3	3	4	4	4	4	4	4	4	3.25	3.33333	4	57
Female	Undergraduate	Rural	2	2	2	2	2	2	2	2	2	2	2	2	2	2	2	2	2	2	2	32
Female	Undergraduate	Rural	3	3	3	3	3	3	3	3	4	3	5	4	4	4	4	4	3	3.16667	4.16667	56
Female	Undergraduate	Rural	3	3	3	3	2	2	2	2	2	2	3	3	3	3	3	3	3	2	3	42
Male	Undergraduate	Urban	5	5	5	5	5	5	5	5	5	5	5	5	5	5	5	5	5	5	5	80
Female	Undergraduate	Rural	1	1	1	1	1	1	1	1	1	1	1	1	1	1	1	1	1	1	1	16
Female	Undergraduate	Rural	3	3	3	3	3	3	3	3	3	3	3	3	3	3	3	3	3	3	3	48
Female	Undergraduate	Rural	4	4	4	4	4	4	4	4	4	4	4	4	4	4	4	4	4	4	4	64
Female	Undergraduate	Rural	4	3	4	2	2	2	2	2	2	2	1	1	1	1	1	1	3.25	2	1	31
Female	Undergraduate	Urban	4	4	4	4	4	4	4	4	4	4	4	4	4	4	4	4	4	4	4	64
Female	Undergraduate	Rural	4	3	2	2	3	2	2	2	2	2	2	2	2	2	2	2	2.75	2.16667	2	36
Female	Undergraduate	Urban	4	3	3	3	3	3	5	3	3	3	4	4	4	4	4	4	3.25	3.33333	4	57
Female	Undergraduate	Urban	4	4	3	4	3	3	3	4	4	5	4	4	5	4	4	5	3.75	3.66667	4.33333	63
Female	Undergraduate	Rural	3	3	2	2	3	4	3	3	3	3	2	2	3	3	3	2	2.5	3.16667	2.5	44
Female	Undergraduate	Rural	4	4	4	4	4	4	4	4	4	4	4	4	4	4	4	4	4	4	4	64
Female	Undergraduate	Urban	5	5	5	5	5	5	5	5	5	5	5	5	5	5	5	5	5	5	5	80
Female	Graduate	Urban	2	4	1	2	2	1	2	2	3	3	3	3	3	2	4	3	2.25	2.16667	3	40
Female	Undergraduate	Urban	3	3	3	3	3	3	3	3	3	3	3	3	3	3	3	3	3	3	3	48
Female	Undergraduate	Rural	4	4	4	4	4	4	4	4	4	4	4	4	4	4	4	4	4	4	4	64
Male	Undergraduate	Rural	3	3	4	2	2	2	4	3	3	4	4	2	3	3	2	3	3	3	2.83333	47
Female	Undergraduate	Rural	3	3	3	4	5	5	5	5	5	5	5	5	4	4	5	4	3.25	5	4.5	70
Female	Undergraduate	Urban	5	5	5	5	5	5	5	5	5	5	5	5	5	5	5	5	5	5	5	80
Female	Undergraduate	Urban	4	5	4	3	3	3	3	2	2	2	1	1	1	1	1	1	4	2.5	1	37
Female	Undergraduate	Urban	2	2	2	2	2	2	2	2	2	2	2	2	2	2	2	2	2	2	2	32
Female	Undergraduate	Rural	3	3	3	3	2	2	2	2	2	2	2	2	2	2	2	2	3	2	2	36
Female	Undergraduate	Urban	3	3	3	3	3	3	3	3	3	3	3	3	3	3	3	3	3	3	3	48
Female	Undergraduate	Rural	4	4	4	4	4	4	4	4	4	4	4	4	4	4	4	4	4	4	4	64
Male	Undergraduate	Rural	1	1	1	1	1	1	1	1	1	1	1	1	1	1	1	1	1	1	1	16
Female	Undergraduate	Rural	3	3	3	3	1	1	1	1	1	1	3	2	2	2	2	2	3	1	2.16667	31
Female	Undergraduate	Rural	3	3	3	3	3	3	3	3	3	3	3	3	3	3	3	3	3	3	3	48
Female	Undergraduate	Rural	3	3	3	3	3	3	3	3	3	3	3	3	3	3	3	3	3	3	3	48
Female	Undergraduate	Rural	4	2	2	2	3	3	3	3	3	3	2	3	2	2	2	2	2.5	3	2.16667	41
Female	Undergraduate	Urban	4	4	4	4	3	2	4	3	2	2	1	1	1	1	1	1	4	2.66667	1	38
Female	Undergraduate	Urban	4	4	4	4	3	3	2	3	2	2	2	2	2	2	2	2	4	2.5	2	43
Female	Undergraduate	Rural	3	3	3	3	2	2	3	2	3	2	3	3	3	3	3	3	3	2.33333	3	44
Female	Undergraduate	Urban	5	5	5	5	5	5	5	5	5	5	5	5	5	5	5	5	5	5	5	80
Female	Undergraduate	Rural	4	4	4	4	4	4	4	4	4	4	4	4	4	4	4	4	4	4	4	64
Female	Undergraduate	Rural	4	4	4	4	2	2	3	2	2	2	4	4	4	4	3	3	4	2.16667	3.66667	51
Female	Undergraduate	Rural	4	3	4	3	4	4	3	4	3	4	4	3	4	3	4	3	3.5	3.66667	3.5	57
Female	Undergraduate	Rural	3	3	3	3	3	3	3	3	3	3	3	3	3	3	3	3	3	3	3	48
Female	Undergraduate	Rural	4	4	4	4	4	4	4	4	4	4	3	3	3	3	3	3	4	4	3	58
Female	Undergraduate	Rural	4	4	4	4	4	4	4	4	4	4	4	4	4	4	4	4	4	4	4	64
Female	Undergraduate	Rural	3	4	3	3	3	3	4	3	3	3	3	3	3	3	3	3	3.25	3.16667	3	50
Female	Undergraduate	Rural	3	4	4	3	4	4	2	4	4	4	4	4	4	4	4	5	3.5	3.66667	4.16667	61
Female	Undergraduate	Rural	3	3	3	3	3	3	3	3	3	3	3	3	3	3	3	3	3	3	3	48
Female	Graduate	Urban	3	2	2	2	4	2	2	2	3	3	2	2	2	2	2	2	2.25	2.66667	2	37
Female	Undergraduate	Rural	3	4	2	2	2	2	2	2	2	2	2	2	2	2	2	2	2.75	2	2	35
Female	Undergraduate	Rural	3	3	3	3	3	4	4	4	4	4	4	4	4	4	4	4	3	3.83333	4	59
Female	Graduate	Urban	2	2	2	2	4	2	2	4	4	4	3	1	1	1	3	2	2	3.33333	1.83333	39
Female	Undergraduate	Rural	4	4	4	4	3	3	3	4	4	3	4	4	4	4	4	4	4	3.33333	4	60
Female	Undergraduate	Rural	5	5	5	5	5	3	5	5	3	3	2	2	2	2	2	2	5	4	2	56
Female	Undergraduate	Rural	4	4	4	4	4	4	4	4	4	4	4	4	4	4	4	4	4	4	4	64
Female	Undergraduate	Urban	2	2	2	2	2	2	2	2	2	2	2	2	2	2	2	2	2	2	2	32
Female	Undergraduate	Urban	2	2	2	2	2	2	2	2	2	2	2	2	2	2	2	2	2	2	2	32
Female	Undergraduate	Rural	5	5	5	5	5	5	5	5	5	5	5	5	5	5	5	5	5	5	5	80
Female	Undergraduate	Rural	4	4	4	4	3	3	3	3	3	3	3	3	3	3	3	3	4	3	3	52
Female	Undergraduate	Urban	2	2	2	3	3	3	3	3	3	3	1	1	1	1	1	1	2.25	3	1	33
Female	Graduate	Rural	3	4	4	4	2	2	2	2	2	2	3	2	2	2	2	2	3.75	2	2.16667	40
Female	Undergraduate	Rural	3	4	3	3	2	2	2	3	3	2	2	2	2	2	2	2	3.25	2.33333	2	39
Female	Undergraduate	Rural	2	2	2	2	2	2	2	2	2	2	2	2	2	2	2	2	2	2	2	32
Female	Undergraduate	Rural	5	5	5	5	5	5	5	5	5	5	5	5	5	5	5	5	5	5	5	80
Female	Undergraduate	Urban	5	5	5	5	5	5	5	5	5	5	4	4	5	5	5	5	5	5	4.66667	78
Female	Undergraduate	Urban	4	4	4	4	4	4	4	4	4	4	4	4	4	4	4	4	4	4	4	64
Female	Undergraduate	Rural	3	4	4	4	3	4	3	4	4	3	4	4	4	3	3	3	3.75	3.5	3.5	57
Female	Undergraduate	Rural	3	4	3	4	3	4	4	5	4	3	3	3	3	3	3	3	3.5	3.83333	3	55
Female	Undergraduate	Urban	3	3	4	4	4	3	3	4	4	4	4	3	3	4	4	4	3.5	3.66667	3.66667	58
Female	Graduate	Urban	5	5	5	5	3	3	3	3	4	3	3	3	3	3	4	3	5	3.16667	3.16667	58
Female	Undergraduate	Urban	4	4	4	4	4	4	4	4	4	4	4	4	4	4	4	4	4	4	4	64
Male	Undergraduate	Urban	3	4	2	2	2	3	2	2	2	2	2	2	2	2	2	2	2.75	2.16667	2	36
Female	Graduate	Urban	3	4	3	4	4	3	3	3	3	3	3	3	3	3	3	3	3.5	3.16667	3	51
Female	Undergraduate	Rural	3	4	2	2	2	2	4	2	4	3	2	4	2	3	3	2	2.75	2.83333	2.66667	44
Female	Undergraduate	Rural	4	4	4	4	4	4	4	4	4	4	4	4	4	4	4	4	4	4	4	64
Female	Undergraduate	Rural	5	5	5	5	5	5	5	5	5	5	5	5	5	5	5	5	5	5	5	80
Male	Undergraduate	Rural	5	5	5	5	5	5	5	5	5	5	5	5	5	5	5	5	5	5	5	80
Female	Undergraduate	Rural	3	3	3	3	3	3	3	3	2	3	3	3	3	4	3	3	3	2.83333	3.16667	48
Female	Undergraduate	Urban	5	5	5	5	5	4	5	4	4	4	4	4	4	4	4	4	5	4.33333	4	70
Female	Undergraduate	Urban	1	1	1	1	1	1	1	1	1	1	1	1	1	1	1	1	1	1	1	16
Female	Undergraduate	Rural	4	3	4	4	4	3	4	4	3	4	3	4	4	3	4	3	3.75	3.66667	3.5	58
Female	Undergraduate	Rural	3	3	3	3	3	3	3	3	3	3	3	3	3	3	3	3	3	3	3	48
Female	Undergraduate	Urban	5	5	5	5	5	5	5	5	5	5	5	5	5	5	5	5	5	5	5	80
Female	Undergraduate	Urban	3	3	3	3	3	3	3	3	3	3	3	3	3	3	3	3	3	3	3	48
Female	Graduate	Urban	4	4	4	4	4	4	4	4	4	4	4	4	4	4	4	4	4	4	4	64
Female	Undergraduate	Urban	4	3	4	4	4	4	3	3	4	4	4	3	4	4	3	4	3.75	3.66667	3.66667	59
Female	Graduate	Rural	3	3	3	3	3	2	2	3	3	4	4	4	4	3	3	3	3	2.83333	3.5	50
Female	Undergraduate	Rural	4	3	3	4	4	4	4	5	5	4	4	4	5	4	4	4	3.5	4.33333	4.16667	65
Female	Undergraduate	Rural	3	2	4	3	4	3	2	4	4	4	3	3	3	3	3	3	3	3.5	3	51
Female	Undergraduate	Rural	3	4	5	2	2	1	2	2	2	5	3	3	2	2	1	2	3.5	2.33333	2.16667	41
Female	Graduate	Urban	4	3	3	4	3	3	3	3	4	3	3	4	3	3	4	3	3.5	3.16667	3.33333	53
Female	Undergraduate	Rural	4	4	4	4	3	3	3	4	4	4	4	4	4	4	4	4	4	3.5	4	61
Female	Undergraduate	Urban	3	3	3	3	3	3	3	3	3	3	3	3	3	3	3	3	3	3	3	48
Female	Undergraduate	Urban	3	3	3	3	3	3	3	3	3	3	3	3	3	3	3	3	3	3	3	48
Female	Undergraduate	Urban	5	5	5	5	5	5	5	5	5	5	5	5	5	5	5	5	5	5	5	80
Female	Undergraduate	Rural	3	2	2	2	1	1	1	2	2	2	2	2	3	2	1	3	2.25	1.5	2.16667	31
Female	Undergraduate	Rural	3	4	3	2	2	3	3	3	3	4	3	4	3	3	3	3	3	3	3.16667	49
Female	Graduate	Rural	3	3	3	3	3	3	3	3	4	3	3	4	4	3	3	3	3	3.16667	3.33333	51
Male	Undergraduate	Urban	4	4	4	4	2	2	2	2	2	2	2	2	2	2	2	2	4	2	2	40
Female	Undergraduate	Rural	3	3	2	2	2	2	2	2	3	2	2	2	2	2	2	2	2.5	2.16667	2	35
Female	Undergraduate	Rural	4	4	4	4	4	4	4	4	4	4	4	4	4	4	4	4	4	4	4	64
Female	Undergraduate	Rural	3	4	3	3	3	3	2	3	4	3	3	4	3	2	3	2	3.25	3	2.83333	48
Female	Undergraduate	Rural	3	4	4	4	4	3	3	4	4	4	4	4	4	4	4	4	3.75	3.66667	4	61
Female	Undergraduate	Rural	3	3	3	3	3	3	3	3	3	3	2	2	2	2	2	2	3	3	2	42
Female	Undergraduate	Rural	2	2	2	2	2	2	2	2	2	2	2	2	2	2	2	2	2	2	2	32
Female	Graduate	Urban	5	5	5	5	5	5	5	5	5	5	5	5	5	5	5	5	5	5	5	80
Female	Graduate	Urban	4	4	3	3	4	3	4	3	4	4	4	4	4	4	4	4	3.5	3.66667	4	60
Female	Undergraduate	Rural	5	5	5	5	5	5	5	5	5	5	5	5	5	5	5	5	5	5	5	80
Female	Undergraduate	Rural	4	4	4	4	3	3	3	3	3	3	3	3	3	3	3	3	4	3	3	52
Female	Undergraduate	Urban	5	5	5	5	4	4	4	4	4	4	4	4	4	4	4	4	5	4	4	68
Female	Undergraduate	Rural	3	3	3	3	3	3	3	3	3	3	3	3	3	3	3	3	3	3	3	48
Female	Undergraduate	Rural	3	4	2	2	2	2	2	2	2	2	3	3	3	3	3	3	2.75	2	3	41
Female	Undergraduate	Urban	5	4	5	4	5	4	5	4	5	4	5	4	5	4	5	4	4.5	4.5	4.5	72
Female	Undergraduate	Rural	4	4	4	4	4	4	4	4	4	4	4	4	4	4	4	4	4	4	4	64
Male	Undergraduate	Rural	1	1	1	5	5	5	5	1	1	1	1	1	1	1	5	4	2	3	2.16667	39
Female	Graduate	Urban	4	4	3	4	4	4	4	4	4	4	4	4	3	3	3	3	3.75	4	3.33333	59
Female	Undergraduate	Rural	3	3	3	3	4	3	4	3	4	3	3	3	4	3	3	3	3	3.5	3.16667	52
Female	Undergraduate	Urban	4	4	4	4	4	4	4	4	4	4	4	4	4	4	4	4	4	4	4	64
Female	Undergraduate	Rural	4	4	4	4	4	4	4	4	4	4	4	4	4	4	4	4	4	4	4	64
Female	Undergraduate	Rural	5	5	5	5	4	4	4	5	4	4	3	4	5	5	3	1	5	4.16667	3.5	66
Female	Undergraduate	Rural	3	3	3	3	3	3	3	3	3	3	3	3	3	3	3	3	3	3	3	48
Female	Undergraduate	Urban	4	5	4	5	3	1	4	1	1	3	5	4	5	5	5	5	4.5	2.16667	4.83333	60
Female	Undergraduate	Rural	3	3	3	3	3	3	3	3	3	3	3	3	3	3	3	3	3	3	3	48
Female	Undergraduate	Rural	5	5	5	5	5	5	5	5	5	5	5	5	5	5	5	5	5	5	5	80
Female	Undergraduate	Rural	4	3	4	3	4	3	4	3	4	3	4	3	4	3	4	3	3.5	3.5	3.5	56
Female	Undergraduate	Urban	3	3	3	3	3	3	3	3	3	3	3	3	3	3	3	3	3	3	3	48
Female	Undergraduate	Rural	4	4	4	3	4	4	4	4	4	4	4	4	4	4	3	4	3.75	4	3.83333	62
Female	Undergraduate	Rural	4	2	3	3	5	4	3	5	5	4	4	4	4	4	4	4	3	4.33333	4	62
Female	Undergraduate	Rural	4	4	4	4	4	4	4	4	4	4	4	4	4	4	4	4	4	4	4	64
Female	Graduate	Urban	4	5	4	5	5	4	5	5	4	4	5	5	4	5	4	5	4.5	4.5	4.66667	73
Male	Undergraduate	Urban	2	2	2	2	2	2	2	2	2	2	2	2	2	2	2	2	2	2	2	32
Female	Undergraduate	Rural	2	2	2	2	1	2	1	1	1	1	1	1	1	1	1	1	2	1.16667	1	21
Female	Undergraduate	Rural	5	5	5	5	5	5	5	5	3	5	2	2	2	2	2	2	5	4.66667	2	60
Female	Undergraduate	Rural	1	1	1	4	1	1	1	1	1	1	1	1	2	2	2	1	1.75	1	1.5	22
Female	Undergraduate	Rural	1	1	1	1	1	1	1	2	2	2	4	4	3	3	4	4	1	1.5	3.66667	35
Female	Undergraduate	Rural	3	2	3	2	2	3	3	4	3	4	3	4	4	4	4	4	2.5	3.16667	3.83333	52
Female	Undergraduate	Urban	3	2	2	2	3	3	3	3	3	3	3	3	3	3	3	3	2.25	3	3	45
Female	Undergraduate	Urban	4	4	4	4	4	4	4	4	4	4	4	4	4	4	4	4	4	4	4	64
Female	Undergraduate	Rural	3	3	3	3	3	3	3	3	3	3	3	3	3	3	3	3	3	3	3	48
Female	Undergraduate	Urban	4	2	5	1	4	3	2	4	3	1	3	3	3	3	3	3	3	2.83333	3	47
Female	Undergraduate	Rural	4	4	4	4	4	4	4	4	4	4	4	4	4	4	4	4	4	4	4	64
Female	Undergraduate	Rural	4	4	4	4	2	2	2	2	2	2	3	3	3	3	3	3	4	2	3	46
Female	Undergraduate	Rural	5	5	5	5	5	5	5	5	5	5	5	5	5	5	5	5	5	5	5	80
Female	Graduate	Urban	4	3	3	4	3	2	4	3	4	4	2	2	2	2	3	4	3.5	3.33333	2.5	49
Female	Graduate	Rural	3	4	4	4	4	3	4	4	4	3	4	4	5	4	4	5	3.75	3.66667	4.33333	63
Female	Undergraduate	Rural	4	4	4	4	4	4	4	4	4	4	4	4	4	4	4	4	4	4	4	64
Male	Undergraduate	Urban	3	3	3	3	2	2	2	2	2	2	1	1	1	1	1	1	3	2	1	30
Female	Undergraduate	Urban	4	4	3	4	4	3	4	4	4	4	4	4	4	4	4	4	3.75	3.83333	4	62
Female	Undergraduate	Rural	4	4	4	4	4	4	4	4	4	4	4	4	4	4	4	4	4	4	4	64
Female	Undergraduate	Rural	3	3	3	3	2	2	2	2	2	2	2	2	2	2	2	2	3	2	2	36
Female	Undergraduate	Rural	3	3	3	3	3	3	3	3	3	3	3	3	4	3	4	3	3	3	3.33333	50
Female	Undergraduate	Rural	4	4	4	4	4	4	4	4	4	4	4	4	4	4	3	4	4	4	3.83333	63
Female	Undergraduate	Rural	4	5	4	4	4	4	5	4	4	4	4	4	3	4	4	5	4.25	4.16667	4	66
Female	Undergraduate	Rural	3	3	3	3	3	3	3	3	3	3	4	4	4	4	4	3	3	3	3.83333	53
Female	Graduate	Urban	3	3	3	3	4	3	4	3	3	3	3	3	3	3	3	3	3	3.33333	3	50
Male	Undergraduate	Urban	4	4	4	4	4	4	4	4	4	4	4	4	4	4	4	4	4	4	4	64
Female	Undergraduate	Rural	3	3	3	3	3	3	3	3	3	3	3	3	3	3	3	3	3	3	3	48
Female	Undergraduate	Urban	3	3	3	3	3	3	3	3	3	3	3	3	3	3	3	3	3	3	3	48
Female	Undergraduate	Rural	3	3	3	3	3	3	3	3	3	3	3	3	3	3	3	3	3	3	3	48
Female	Undergraduate	Rural	3	3	4	3	3	3	3	4	3	4	3	3	3	4	2	3	3.25	3.33333	3	51
Female	Graduate	Urban	3	3	3	3	3	3	3	3	3	3	3	3	3	3	3	3	3	3	3	48
Male	Undergraduate	Rural	3	3	3	3	3	3	3	3	3	3	3	3	3	3	3	3	3	3	3	48
Female	Undergraduate	Rural	3	4	3	4	4	3	4	3	4	3	3	3	3	3	3	3	3.5	3.5	3	53
Female	Undergraduate	Rural	3	3	3	3	3	3	3	3	3	3	3	3	3	3	3	3	3	3	3	48
Female	Undergraduate	Rural	3	3	4	4	3	3	3	3	3	3	3	3	3	3	3	3	3.5	3	3	50
Female	Undergraduate	Rural	4	4	4	4	4	4	4	4	4	4	4	4	4	4	4	4	4	4	4	64
Male	Undergraduate	Urban	4	4	4	4	4	4	4	4	4	4	4	4	4	4	4	4	4	4	4	64
Female	Undergraduate	Rural	4	4	4	4	4	4	4	4	4	4	4	3	4	4	3	3	4	4	3.5	61
Female	Undergraduate	Rural	3	3	3	3	2	2	3	2	2	2	1	1	1	1	1	1	3	2.16667	1	31
Female	Undergraduate	Rural	3	3	4	3	3	3	2	3	4	4	4	4	4	3	3	3	3.25	3.16667	3.5	53
Female	Undergraduate	Rural	3	3	3	3	3	3	3	3	3	3	3	3	3	3	3	3	3	3	3	48
Female	Undergraduate	Rural	3	3	3	2	3	2	3	3	3	3	3	3	2	2	3	3	2.75	2.83333	2.66667	44
Female	Undergraduate	Rural	4	4	4	4	3	4	5	4	4	4	4	4	4	4	4	4	4	4	4	64
Female	Undergraduate	Rural	5	5	5	5	2	2	3	3	2	2	4	4	4	4	4	4	5	2.33333	4	58
Female	Undergraduate	Urban	4	4	4	4	4	4	4	4	4	4	4	4	4	4	4	4	4	4	4	64
Female	Undergraduate	Rural	4	4	3	3	3	2	3	4	3	3	4	4	4	4	4	4	3.5	3	4	56
Female	Undergraduate	Rural	2	4	2	2	3	2	2	2	2	2	2	2	2	2	2	2	2.5	2.16667	2	35
Female	Undergraduate	Rural	5	5	5	5	4	4	4	4	4	4	4	4	4	4	4	4	5	4	4	68
Female	Undergraduate	Urban	4	4	3	4	3	4	3	3	4	3	4	3	4	3	4	3	3.75	3.33333	3.5	56
Female	Undergraduate	Rural	5	5	5	5	3	3	3	4	4	4	4	4	4	4	4	4	5	3.5	4	65
Female	Undergraduate	Rural	5	5	5	5	5	5	5	5	5	5	5	5	5	5	5	5	5	5	5	80
Male	Undergraduate	Rural	4	4	4	4	4	4	4	4	4	4	4	4	4	4	4	4	4	4	4	64
Female	Undergraduate	Urban	4	4	4	4	4	4	4	4	4	4	4	3	4	3	3	4	4	4	3.5	61
Female	Undergraduate	Rural	5	5	5	5	5	5	5	5	5	5	5	5	5	5	5	5	5	5	5	80
Male	Undergraduate	Rural	1	2	2	4	2	2	3	3	1	1	4	4	1	3	3	3	2.25	2	3	39
Female	Undergraduate	Rural	4	4	4	3	3	3	3	3	3	3	3	3	3	3	3	1	3.75	3	2.66667	49
Male	Undergraduate	Rural	3	3	3	4	2	3	2	3	2	2	3	2	3	3	3	3	3.25	2.33333	2.83333	44
Female	Undergraduate	Urban	5	5	5	5	5	5	5	5	5	5	5	5	5	5	5	5	5	5	5	80
Male	Undergraduate	Rural	3	3	3	3	3	3	3	3	3	3	3	3	3	3	3	3	3	3	3	48
Female	Undergraduate	Urban	5	5	5	5	1	1	1	1	1	1	1	1	1	1	1	1	5	1	1	32
Female	Undergraduate	Rural	3	3	3	3	3	3	3	3	3	3	3	3	3	3	3	3	3	3	3	48
Female	Undergraduate	Urban	3	3	3	3	3	3	3	3	3	3	3	3	3	3	3	3	3	3	3	48
Female	Undergraduate	Rural	3	3	3	3	3	3	3	3	3	3	3	3	3	3	3	3	3	3	3	48
Female	Undergraduate	Rural	5	5	5	5	4	4	4	4	4	4	5	5	5	5	5	5	5	4	5	74
Male	Undergraduate	Urban	3	3	3	3	3	3	3	3	3	3	3	3	3	3	3	3	3	3	3	48
Female	Undergraduate	Urban	4	5	4	4	3	3	3	3	3	3	4	3	4	3	4	4	4.25	3	3.66667	57
Female	Undergraduate	Rural	3	3	3	3	3	3	3	3	3	3	3	3	3	3	3	3	3	3	3	48
Male	Undergraduate	Rural	3	4	3	2	3	4	3	3	3	2	3	3	3	2	3	3	3	3	2.83333	47
Male	Undergraduate	Rural	4	3	4	4	4	4	4	4	4	4	3	3	4	3	4	3	3.75	4	3.33333	59
Female	Undergraduate	Rural	4	3	3	3	3	3	3	3	3	3	3	4	3	4	3	4	3.25	3	3.5	52
Male	Undergraduate	Rural	5	4	3	2	1	2	3	4	3	4	2	3	4	2	4	4	3.5	2.83333	3.16667	50
Female	Undergraduate	Rural	3	3	3	3	3	3	3	3	3	3	3	3	3	3	3	3	3	3	3	48
Female	Undergraduate	Rural	4	3	4	4	4	3	4	4	4	4	4	4	4	4	4	4	3.75	3.83333	4	62
Male	Undergraduate	Urban	4	4	4	5	4	4	4	4	4	4	4	4	4	4	4	4	4.25	4	4	65
Female	Undergraduate	Rural	3	3	3	3	4	3	3	3	4	3	3	3	3	3	3	3	3	3.33333	3	50
Female	Undergraduate	Rural	3	3	3	3	3	3	3	3	3	3	3	3	3	3	3	3	3	3	3	48
Male	Undergraduate	Rural	5	5	5	5	5	5	5	5	5	5	5	5	5	5	5	5	5	5	5	80
Male	Undergraduate	Rural	5	5	5	5	5	5	5	5	5	5	5	5	5	5	5	5	5	5	5	80
Male	Undergraduate	Rural	3	3	3	3	3	3	3	3	4	3	3	3	3	3	3	3	3	3.16667	3	49
Male	Undergraduate	Rural	3	2	4	2	4	3	4	2	4	2	4	4	2	4	3	3	2.75	3.16667	3.33333	50
Female	Undergraduate	Rural	2	3	2	2	3	4	4	4	3	3	3	3	3	3	3	2	2.25	3.5	2.83333	47
Female	Undergraduate	Rural	4	4	4	4	4	4	4	4	4	4	3	3	3	3	4	4	4	4	3.33333	60
Female	Undergraduate	Rural	4	4	4	4	4	4	1	2	3	3	3	3	3	3	3	3	4	2.83333	3	51
Female	Undergraduate	Rural	4	4	4	4	4	4	4	4	4	4	4	4	4	4	4	4	4	4	4	64
Male	Undergraduate	Rural	5	5	5	5	5	5	5	5	5	5	5	5	5	5	5	5	5	5	5	80
Male	Undergraduate	Urban	3	3	3	3	3	3	3	3	3	3	3	3	3	3	3	3	3	3	3	48
Female	Undergraduate	Rural	3	3	3	3	3	3	3	3	3	3	3	3	3	4	3	3	3	3	3.16667	49
Female	Undergraduate	Rural	3	3	3	3	3	3	3	3	3	3	3	3	3	3	3	3	3	3	3	48
Female	Undergraduate	Rural	4	4	4	4	4	4	4	4	4	4	3	3	3	3	3	3	4	4	3	58
Female	Undergraduate	Rural	4	4	4	4	4	3	4	3	4	3	4	3	4	3	4	3	4	3.5	3.5	58
Male	Undergraduate	Rural	3	4	3	3	3	4	3	4	3	4	3	4	3	4	3	4	3.25	3.5	3.5	55
Female	Undergraduate	Rural	3	3	3	3	3	4	3	3	4	3	3	3	3	4	3	3	3	3.33333	3.16667	51
Female	Undergraduate	Urban	5	4	4	4	3	3	2	3	2	3	3	3	3	3	3	3	4.25	2.66667	3	51
Female	Undergraduate	Rural	3	3	3	3	3	3	3	3	3	3	3	3	3	3	3	3	3	3	3	48
Female	Undergraduate	Rural	3	3	3	3	3	3	3	3	3	3	3	3	3	3	3	3	3	3	3	48
Female	Undergraduate	Urban	4	4	4	4	4	4	4	4	4	4	4	4	4	4	4	4	4	4	4	64
Male	Undergraduate	Rural	4	4	4	4	4	4	4	4	4	4	4	4	4	4	4	4	4	4	4	64
Female	Undergraduate	Rural	4	3	4	3	3	3	3	3	4	3	3	4	4	4	3	4	3.5	3.16667	3.66667	55
Female	Undergraduate	Urban	3	4	4	4	3	4	4	4	4	4	4	4	4	4	4	4	3.75	3.83333	4	62
Female	Undergraduate	Rural	3	3	3	2	3	3	2	2	2	3	4	3	4	4	3	4	2.75	2.5	3.66667	48
Female	Undergraduate	Urban	4	4	4	4	2	3	2	3	4	3	3	3	3	3	2	3	4	2.83333	2.83333	50
Female	Undergraduate	Urban	4	3	4	3	4	3	4	3	4	3	3	4	3	4	3	4	3.5	3.5	3.5	56
Female	Undergraduate	Rural	4	4	4	4	3	3	3	3	3	3	3	3	3	3	3	3	4	3	3	52
Female	Undergraduate	Urban	4	5	4	5	4	4	5	4	4	5	3	3	4	3	4	4	4.5	4.33333	3.5	65
Female	Undergraduate	Rural	3	3	3	3	3	3	3	3	3	3	3	3	3	3	3	3	3	3	3	48
Female	Undergraduate	Rural	3	3	3	3	3	3	3	3	3	3	3	3	3	3	3	3	3	3	3	48
Male	Undergraduate	Rural	4	3	3	4	3	4	2	4	3	2	4	3	2	3	4	2	3.5	3	3	50
Female	Undergraduate	Rural	5	5	5	4	4	4	4	5	3	4	5	4	4	4	4	4	4.75	4	4.16667	68
Female	Undergraduate	Rural	5	5	5	5	5	5	5	5	5	5	5	5	5	5	5	5	5	5	5	80
Female	Undergraduate	Rural	5	5	5	5	5	5	5	5	5	5	5	5	5	5	5	5	5	5	5	80
Male	Undergraduate	Rural	5	5	5	5	5	5	5	5	5	5	2	2	2	2	2	2	5	5	2	62
Female	Undergraduate	Urban	3	3	4	3	3	2	3	2	2	3	3	3	3	3	3	3	3.25	2.5	3	46
Female	Undergraduate	Urban	3	3	3	3	2	2	2	2	2	2	3	3	3	3	2	2	3	2	2.66667	40
Female	Undergraduate	Urban	3	4	3	4	2	1	3	1	2	2	1	1	1	1	1	1	3.5	1.83333	1	31
Female	Undergraduate	Rural	2	4	4	5	4	4	5	3	4	4	4	4	3	4	4	4	3.75	4	3.83333	62
Male	Undergraduate	Rural	5	5	5	5	5	3	3	3	3	3	5	4	3	3	3	4	5	3.33333	3.66667	62
Female	Undergraduate	Rural	5	5	5	5	5	5	5	5	5	5	5	5	5	5	5	5	5	5	5	80
Female	Undergraduate	Rural	4	2	2	2	2	2	2	2	2	2	2	2	2	2	2	2	2.5	2	2	34
Female	Undergraduate	Rural	4	4	4	4	2	2	2	2	2	2	2	2	2	2	2	2	4	2	2	40
Female	Undergraduate	Rural	3	4	3	2	2	2	2	2	2	2	4	4	3	4	4	3	3	2	3.66667	46
Female	Undergraduate	Rural	4	3	4	4	2	2	3	4	4	4	4	4	4	4	3	4	3.75	3.16667	3.83333	57
Female	Undergraduate	Rural	3	3	3	3	3	3	3	3	3	3	3	3	3	3	3	3	3	3	3	48
Female	Undergraduate	Urban	4	4	4	4	4	4	4	4	4	4	4	4	4	4	4	4	4	4	4	64
Male	Undergraduate	Rural	1	2	3	2	2	2	3	3	2	2	3	2	3	3	3	2	2	2.33333	2.66667	38
Female	Undergraduate	Urban	4	4	4	4	4	4	4	4	4	4	4	4	4	4	4	4	4	4	4	64
Male	Undergraduate	Rural	3	4	3	4	3	4	3	4	4	4	4	3	4	4	3	4	3.5	3.66667	3.66667	58
Female	Undergraduate	Rural	3	3	3	3	3	3	3	3	3	3	3	3	3	3	3	3	3	3	3	48
Female	Undergraduate	Rural	3	3	2	3	3	3	2	3	3	3	3	2	3	4	3	3	2.75	2.83333	3	46
Female	Undergraduate	Urban	3	3	3	3	3	3	3	3	3	3	3	3	3	3	3	3	3	3	3	48
Female	Undergraduate	Rural	5	5	5	5	5	5	5	5	5	5	3	3	3	3	3	3	5	5	3	68
Female	Undergraduate	Rural	3	3	3	4	3	3	3	3	3	3	3	2	2	2	3	3	3.25	3	2.5	46
Female	Undergraduate	Rural	4	4	4	4	3	3	3	3	3	3	3	3	3	3	3	3	4	3	3	52
Female	Undergraduate	Rural	3	3	3	3	3	3	3	3	3	3	3	3	3	3	3	3	3	3	3	48
Female	Undergraduate	Rural	4	4	4	4	4	4	4	4	4	4	4	4	4	4	4	4	4	4	4	64
Female	Undergraduate	Rural	4	4	4	4	4	4	4	4	4	4	4	4	4	4	4	4	4	4	4	64
Female	Undergraduate	Rural	3	3	2	2	2	2	2	2	3	2	3	3	2	2	2	2	2.5	2.16667	2.33333	37
Male	Undergraduate	Rural	5	5	5	5	5	5	5	5	5	5	5	5	5	5	5	5	5	5	5	80
Female	Undergraduate	Rural	5	5	5	5	3	3	3	3	3	3	3	3	3	3	3	3	5	3	3	56
Female	Undergraduate	Rural	2	3	3	3	2	2	3	3	2	2	1	1	1	1	1	1	2.75	2.33333	1	31
Female	Undergraduate	Rural	4	3	4	4	4	4	5	4	4	4	4	3	4	4	5	4	3.75	4.16667	4	64
Female	Undergraduate	Rural	3	3	3	3	4	3	3	4	4	4	3	3	4	4	3	3	3	3.66667	3.33333	54
Female	Undergraduate	Rural	3	3	3	3	3	3	3	3	3	3	3	3	3	4	2	3	3	3	3	48
Female	Undergraduate	Rural	4	2	2	2	3	3	3	4	4	4	4	4	4	4	4	4	2.5	3.5	4	55
Male	Undergraduate	Rural	1	1	1	1	1	1	1	1	1	1	1	1	1	1	1	1	1	1	1	16
Female	Undergraduate	Rural	5	5	5	5	2	2	2	2	2	2	2	2	2	2	2	2	5	2	2	44
Male	Undergraduate	Rural	3	3	4	3	3	4	3	4	3	3	3	3	4	3	3	3	3.25	3.33333	3.16667	52
Female	Undergraduate	Rural	3	3	3	2	2	1	1	2	2	3	3	2	3	2	2	2	2.75	1.83333	2.33333	36
Male	Undergraduate	Rural	3	3	3	3	3	3	3	3	3	3	3	3	3	3	3	3	3	3	3	48
Female	Undergraduate	Rural	5	5	5	5	5	5	5	5	5	5	5	5	5	5	5	5	5	5	5	80
Female	Undergraduate	Urban	2	2	3	1	4	5	3	3	4	5	2	2	2	1	5	5	2	4	2.83333	49
Female	Undergraduate	Rural	4	4	4	4	4	4	4	4	4	4	4	4	4	4	4	4	4	4	4	64
Male	Undergraduate	Urban	5	5	5	5	5	5	5	5	5	5	5	5	5	5	5	5	5	5	5	80
Female	Undergraduate	Rural	4	4	4	4	3	4	4	4	3	4	4	3	4	3	4	3	4	3.66667	3.5	59
Female	Undergraduate	Rural	3	3	3	3	3	3	3	3	3	3	3	3	3	3	3	3	3	3	3	48
Female	Undergraduate	Urban	3	4	4	2	2	2	2	3	3	3	3	3	3	3	2	3	3.25	2.5	2.83333	45
Female	Undergraduate	Rural	5	5	5	5	5	5	5	5	5	5	5	5	5	5	5	5	5	5	5	80
Female	Undergraduate	Rural	4	4	4	4	4	4	4	4	4	4	4	4	4	4	4	4	4	4	4	64
Male	Undergraduate	Rural	5	5	5	5	5	5	5	5	5	5	5	5	5	5	5	5	5	5	5	80
Female	Undergraduate	Rural	4	4	4	3	3	2	3	2	2	2	3	3	2	2	2	2	3.75	2.33333	2.33333	43
Female	Undergraduate	Urban	5	5	5	5	5	5	5	5	5	5	5	5	5	5	5	5	5	5	5	80
Female	Undergraduate	Rural	5	5	5	4	4	4	4	4	4	4	2	2	2	2	2	2	4.75	4	2	55
Female	Undergraduate	Rural	3	5	3	4	3	4	4	3	3	4	3	4	3	4	2	3	3.75	3.5	3.16667	55
Female	Undergraduate	Rural	4	3	2	2	2	3	2	1	2	1	2	3	2	2	2	2	2.75	1.83333	2.16667	35
Female	Undergraduate	Rural	3	3	3	3	3	3	3	4	4	3	4	4	4	3	4	3	3	3.33333	3.66667	54
Female	Undergraduate	Rural	3	3	3	4	2	2	3	3	3	3	3	3	3	2	3	3	3.25	2.66667	2.83333	46
Female	Undergraduate	Urban	4	3	4	3	4	3	4	4	3	3	2	2	3	2	3	2	3.5	3.5	2.33333	49
Female	Undergraduate	Rural	2	2	2	2	2	2	2	2	2	2	2	2	2	2	2	2	2	2	2	32
Male	Undergraduate	Urban	4	4	4	4	4	4	4	4	4	4	4	4	4	4	4	4	4	4	4	64
Female	Undergraduate	Rural	3	3	3	4	2	2	2	2	3	3	3	3	3	3	3	3	3.25	2.33333	3	45
Female	Undergraduate	Rural	4	4	4	4	4	4	4	4	4	4	4	4	4	4	4	4	4	4	4	64
Male	Undergraduate	Rural	4	4	4	4	4	4	4	4	4	4	4	4	4	4	4	4	4	4	4	64
Male	Undergraduate	Rural	4	4	4	4	4	5	5	5	4	5	4	4	4	4	4	5	4	4.66667	4.16667	69
Male	Undergraduate	Rural	5	4	5	4	4	5	4	5	4	5	4	5	4	5	4	5	4.5	4.5	4.5	72
Female	Graduate	Urban	2	3	3	3	2	2	2	3	3	3	2	2	3	3	2	3	2.75	2.5	2.5	41
Male	Undergraduate	Urban	4	4	3	4	3	4	3	3	3	3	4	4	3	3	4	4	3.75	3.16667	3.66667	56
Female	Undergraduate	Rural	2	4	4	2	4	4	4	4	4	4	5	4	4	4	4	4	3	4	4.16667	61
Male	Undergraduate	Rural	5	4	4	4	3	4	4	4	4	4	4	3	4	4	4	5	4.25	3.83333	4	64
Female	Undergraduate	Urban	3	3	3	3	2	1	1	1	1	1	1	1	1	1	1	1	3	1.16667	1	25
Female	Undergraduate	Urban	5	5	5	5	5	5	5	5	5	5	5	5	5	5	5	5	5	5	5	80
Female	Undergraduate	Urban	3	3	3	3	3	3	3	3	3	3	3	3	3	3	1	3	3	3	2.66667	46
Female	Undergraduate	Rural	5	5	5	5	5	5	5	5	5	5	5	5	5	5	5	5	5	5	5	80
Female	Graduate	Urban	5	5	5	3	5	5	5	5	5	5	5	5	5	5	5	5	4.5	5	5	78
Female	Undergraduate	Rural	3	4	4	3	4	4	4	4	4	4	4	4	4	4	4	4	3.5	4	4	62
Female	Undergraduate	Rural	4	4	4	4	4	4	4	4	4	4	4	4	4	4	4	4	4	4	4	64
Female	Undergraduate	Urban	4	4	4	4	4	4	4	4	4	4	4	4	4	4	4	4	4	4	4	64
Female	Undergraduate	Urban	5	5	5	5	5	5	5	5	5	5	5	5	5	5	5	5	5	5	5	80
Female	Undergraduate	Urban	3	3	3	3	3	3	3	3	3	3	3	3	3	3	3	3	3	3	3	48
Female	Undergraduate	Rural	2	4	2	2	2	2	2	3	3	2	2	2	2	2	2	2	2.5	2.33333	2	36
Female	Undergraduate	Urban	3	3	3	3	3	3	3	3	3	3	3	3	3	3	3	3	3	3	3	48
Female	Undergraduate	Urban	3	3	3	3	3	3	3	3	3	3	3	3	3	3	3	3	3	3	3	48
Male	Undergraduate	Urban	5	5	5	5	5	5	5	5	5	5	5	5	5	4	4	4	5	5	4.5	77
Male	Undergraduate	Rural	4	4	4	4	4	4	4	4	4	4	4	4	4	4	4	4	4	4	4	64
Male	Undergraduate	Rural	4	4	4	3	3	4	3	3	4	4	4	4	4	3	4	3	3.75	3.5	3.66667	58
Male	Undergraduate	Rural	3	3	3	3	3	3	3	3	3	3	3	3	3	3	3	3	3	3	3	48
Male	Undergraduate	Rural	4	4	5	4	2	2	2	2	2	3	2	2	2	2	2	2	4.25	2.16667	2	42
Male	Undergraduate	Rural	4	4	5	4	3	3	3	3	3	3	3	3	3	3	3	3	4.25	3	3	53
Male	Undergraduate	Rural	4	2	5	5	4	4	4	1	4	4	2	4	4	4	2	4	4	3.5	3.33333	57
Male	Undergraduate	Rural	4	3	5	4	3	4	4	4	3	4	4	3	4	4	3	4	4	3.66667	3.66667	60
Female	Undergraduate	Rural	4	4	4	4	4	4	4	4	4	4	4	4	4	4	4	4	4	4	4	64
Female	Undergraduate	Rural	4	3	4	4	4	4	4	4	4	4	4	4	4	4	4	4	3.75	4	4	63
Female	Undergraduate	Urban	5	4	4	4	4	4	4	4	4	4	4	4	4	4	4	4	4.25	4	4	65
Female	Undergraduate	Urban	3	3	3	3	2	4	4	4	4	4	4	4	4	4	4	4	3	3.66667	4	58
Female	Undergraduate	Rural	3	4	3	4	2	2	2	3	3	4	2	3	3	3	3	3	3.5	2.66667	2.83333	47
Female	Undergraduate	Rural	3	3	4	4	4	4	3	4	4	4	4	4	4	4	4	4	3.5	3.83333	4	61
Female	Undergraduate	Rural	3	3	3	3	3	2	2	2	2	2	2	2	2	2	2	2	3	2.16667	2	37
Female	Undergraduate	Rural	4	3	3	3	3	3	3	3	4	3	4	2	4	4	3	3	3.25	3.16667	3.33333	52
Female	Undergraduate	Rural	2	3	3	3	2	3	2	2	2	2	2	2	2	2	2	2	2.75	2.16667	2	36
Female	Undergraduate	Urban	4	5	5	3	3	3	3	4	3	3	4	3	4	3	4	3	4.25	3.16667	3.5	57
Female	Undergraduate	Urban	4	4	4	3	4	4	4	4	3	4	4	4	4	4	3	2	3.75	3.83333	3.5	59
Female	Undergraduate	Rural	3	3	3	3	3	3	3	3	3	3	3	3	3	3	3	3	3	3	3	48
Female	Undergraduate	Rural	4	3	4	5	4	3	4	4	3	4	4	3	4	3	3	4	4	3.66667	3.5	59
Female	Undergraduate	Rural	4	4	3	4	4	4	4	4	4	4	2	2	2	2	2	2	3.75	4	2	51
Female	Undergraduate	Rural	2	2	2	2	5	4	4	4	4	4	1	1	1	1	1	1	2	4.16667	1	39
Female	Undergraduate	Rural	5	5	4	5	4	5	4	5	5	5	5	5	5	5	5	5	4.75	4.66667	5	77
Male	Undergraduate	Rural	3	3	4	2	1	1	1	1	1	1	1	1	1	1	1	1	3	1	1	24
Female	Undergraduate	Urban	4	3	4	3	4	3	4	3	4	3	4	3	4	3	4	3	3.5	3.5	3.5	56
Female	Undergraduate	Rural	3	4	4	3	4	3	4	4	3	4	2	2	2	2	2	2	3.5	3.66667	2	48
Female	Undergraduate	Urban	3	3	3	2	3	3	4	3	3	3	3	3	1	2	3	2	2.75	3.16667	2.33333	44
Female	Undergraduate	Urban	2	2	2	2	3	3	3	3	3	3	3	3	3	3	3	3	2	3	3	44
Male	Undergraduate	Rural	4	4	4	4	4	4	4	4	4	4	4	4	4	4	4	4	4	4	4	64
Female	Undergraduate	Rural	4	4	4	4	4	4	4	4	4	4	4	4	4	4	4	4	4	4	4	64
Male	Undergraduate	Rural	3	4	4	4	4	4	4	4	4	4	4	4	4	4	4	4	3.75	4	4	63
Female	Undergraduate	Urban	1	1	1	3	1	1	1	1	1	1	1	1	1	1	1	1	1.5	1	1	18
Female	Undergraduate	Rural	3	3	3	3	3	3	3	3	3	3	3	3	3	3	3	3	3	3	3	48
Female	Undergraduate	Rural	2	2	2	2	2	2	4	4	4	4	4	4	4	4	4	4	2	3.33333	4	52
